# Supplementary material for: Matrix-Free High-Resolution Atmospheric-Pressure SALDI Mass Spectrometry Imaging of Biological Samples Using Nanostructured DIUTHAME Membranes
Source: MDPI journal article supplement (doi:10.3390/metabo11090624), 2021-09-15
Supplement: s1 [file s1]

# Matrix-free high-resolution atmospheric-pressure SALDI mass spectrometry imaging of biological samples using DIUTHAME membranes

Max A. Müller, Dhaka R. Bhandari, Bernhard Spengler

Institute of Inorganic and Analytical Chemistry, Justus Liebig University, Giessen, Germany

## Supporting Information

|                                                                                                                           | page |
|---------------------------------------------------------------------------------------------------------------------------|------|
| 1. Microscopic image of ablation spots in MALDI, DIUTHAME and LDI mode                                                    | 2    |
| 2. Scheme of incomplete or complete DIUTHAME attachment                                                                   | 2    |
| 3. MS image from incompletely attached DIUTHAME on mouse brain tissue                                                     | 2    |
| 4. Pie charts of ion adducts and lipid class annotations for MS measurements with MALDI or DIUTHAME on mouse brain tissue | 3    |
| 5. Mass spectra from blank DIUTHAME and DIUTHAME, attached to mouse kidney tissue in negative-ion mode                    | 4    |
| 6. Mass spectrum of DIUTHAME measurement on mouse kidney tissue with a mass range from $m/z$ 250-1000                     | 4    |
| 7. Mass spectrum of LDI measurement on mouse brain tissue                                                                 | 5    |
| 8. MALDI MS image from mouse brain cerebellum showing Purkinje cells                                                      | 5    |
| 9. MS images from mouse brain tissue with DIUTHAME membrane attached                                                      | 6    |
| 10. MS images from mouse kidney tissue with DIUTHAME membrane attached                                                    | 7    |
| 11. MS images from germinated rapeseed with DIUTHAME membrane attached                                                    | 8    |
| 12. MS images from <i>Spodoptera littoralis</i> tissue with DIUTHAME membrane attached                                    | 9    |
| 13. Evaluation of intensity gradient from rapeseed DIUTHAME MSI measurement                                               | 10   |
| 14. Optical image of DIUTHAME membrane                                                                                    | 10   |
| 15. Microscopic image of mouse brain tissue with DIUTHAME membrane attached                                               | 11   |
| 16. Microscopic image of mouse brain tissue stained with hematoxylin and eosin                                            | 12   |
| 17. List of lipid annotations to mass signals for DIUTHAME MSI on mouse brain tissue                                      | 13   |
| 18. List of lipid annotations to mass signals for MALDI MSI on mouse brain tissue                                         | 15   |
| 19. Protocol for hematoxylin and eosin staining                                                                           | 27   |
| 20. References for the Supporting Information                                                                             | 27   |

\*Address correspondence to:

Institute of Inorganic and Analytical Chemistry

Justus Liebig University Giessen

Heinrich Buff Ring 17

35392 Giessen, Germany

Phone: +49 641 99 34801

e-mail: [bernhard.spengler@anorg.chemie.uni-giessen.de](mailto:bernhard.spengler@anorg.chemie.uni-giessen.de)

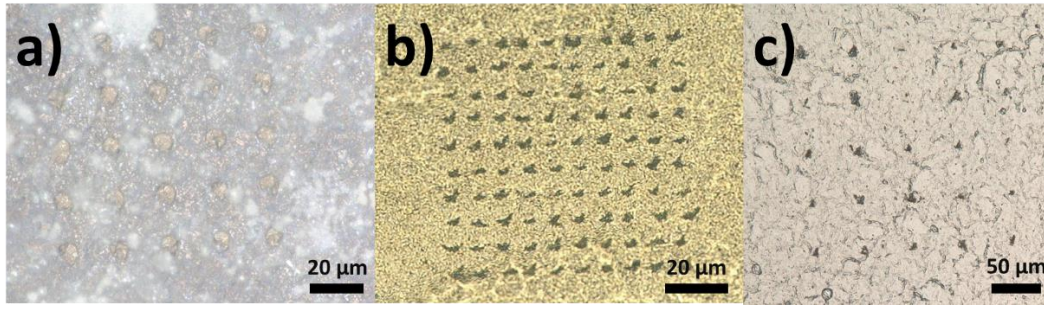

Supporting Figure 1: Microscopic images of ablation spots produced by MALD MSI with 20  $\mu\text{m}$  step size (a), DIUTHAME with 10  $\mu\text{m}$  step size (b) and LDI with 50  $\mu\text{m}$  step size (c), respectively. Laser intensity was the same as for the imaging experiments shown in Figure 2.

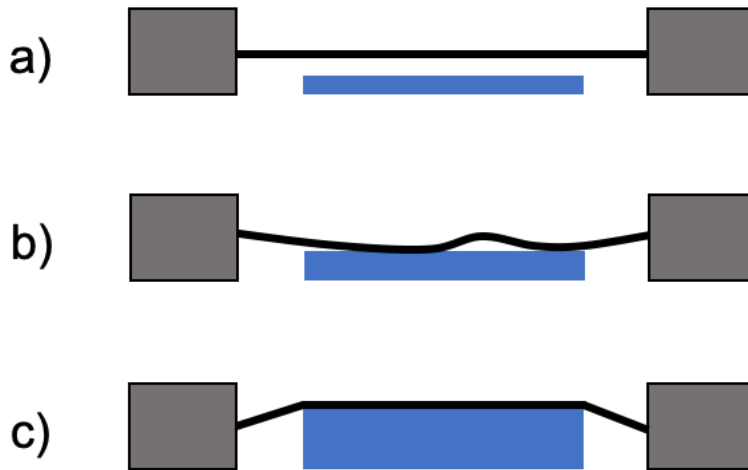

Supporting Figure 2: Scheme of DIUTHAME effective area (black) attachment to a sample (blue). a) No connection between DIUTHAME and the sample when the sample is too thin. Thereby, no ion signal is generated. b) Incomplete attachment of DIUTHAME to a medium thick sample, leaving room for air bubbles, causing intermediate signal loss. c) Complete and firm attachment of DIUTHAME to a thicker sample, ensuring a homogeneous and distortion-free desorption and ionization of analytes.

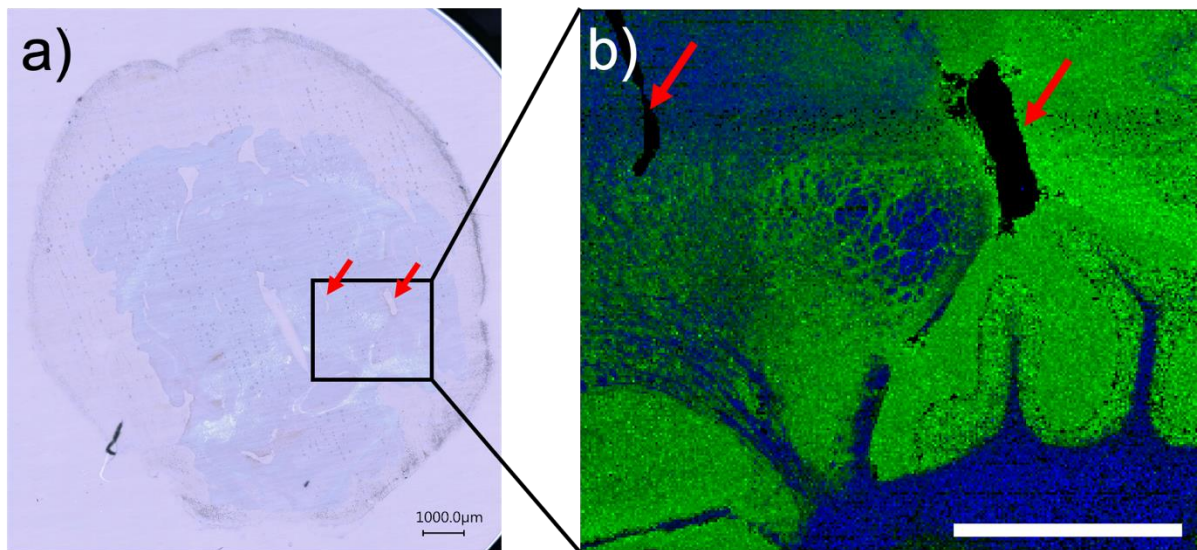

Supporting Figure 3: a) Microscopic image of mouse brain tissue with incomplete DIUTHAME membrane attachment. Air bubbles are highlighted with red arrows. b) DIUTHAME MSI image of a region in mouse brain cerebellum in positive-ion mode. Pixel size 10  $\mu\text{m}$ , 270x270 pixels,  $m/z$  600 – 1000. Color coding: green:  $m/z$  772.5279 [PC 32:0 + K]<sup>+</sup>, blue:  $m/z$  848.6405 [PS 40:0 + H]<sup>+</sup>. Red arrows indicate the position of the air bubbles visible from (a), producing blind spots in the MSI results. Scale bars: 1 mm.

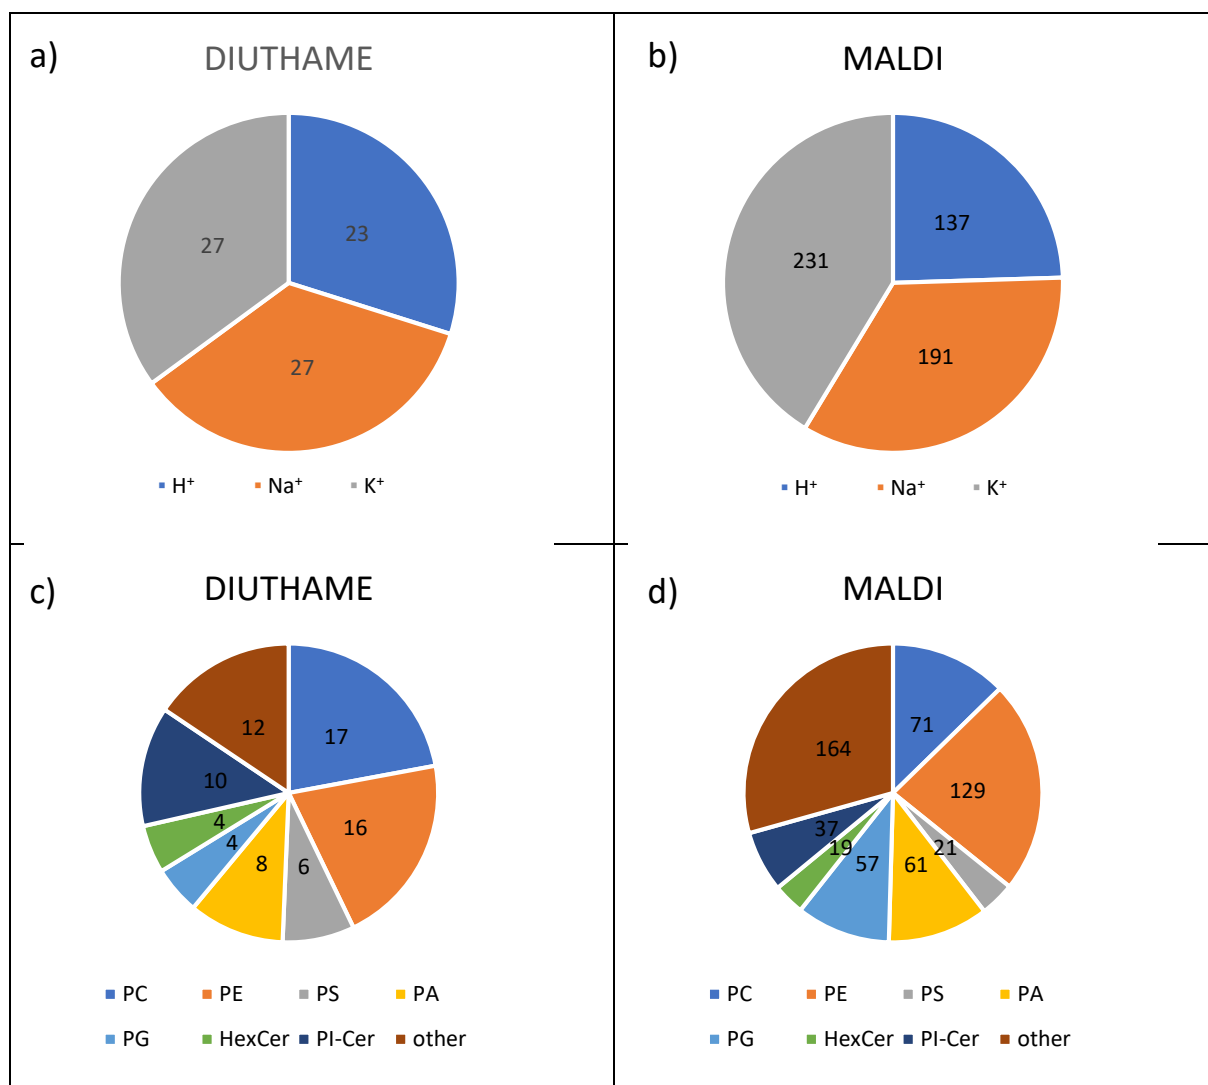

Supporting Figure 4: Pie chart of the ion adducts and lipid classes found through annotation by LIPIDMAPS. a) DIUTHAME ion adducts. b) MALDI ion adducts. c) DIUTHAME lipid classes. d) MALDI lipid classes. PC = phosphatidylcholine, PE = phosphatidylethanolamine, PS = phosphatidylserine, PA = Phosphatidic acid, PG = Phosphatidylglycerol, HexCer = Hexosylceramide, PI-Cer = ceramide phosphoinositol, other = belonging to any other lipid class than the ones listed.

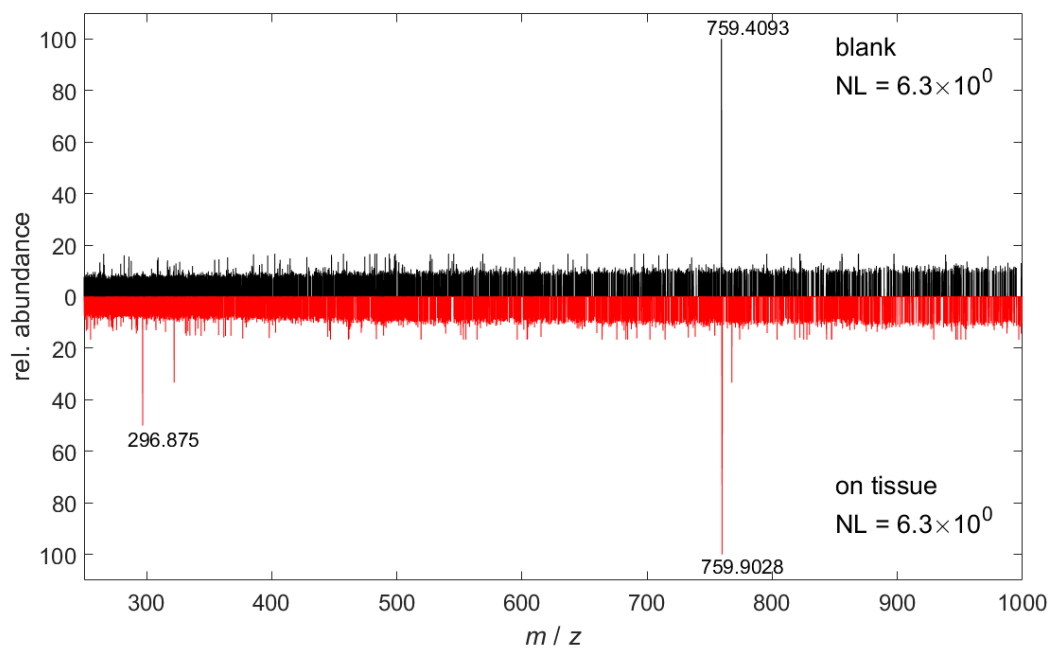

Supporting Figure 5: Comparison of 100 summed-up mass spectra in negative-ion mode acquired using a blank DIUTHAME membrane (black) and a DIUTHAME membrane attached to mouse kidney tissue (red).

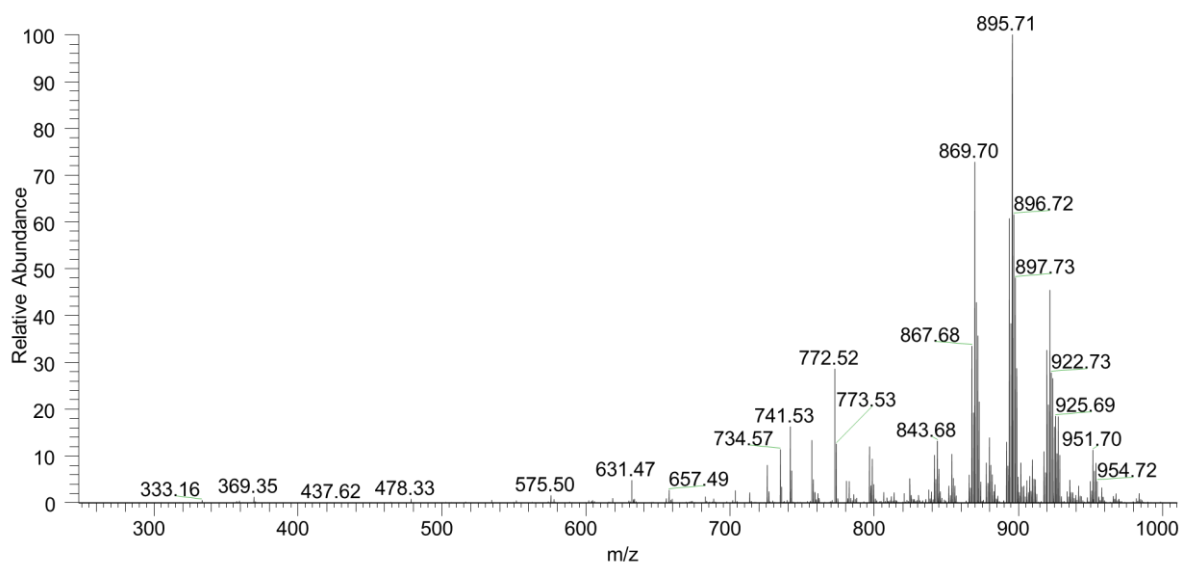

Supporting Figure 6: 100 summed-up mass spectra from mouse kidney tissue investigated by DIUTHAME MSI in positive ion mode showing no significant signal in the lower mass range below  $m/z$  500. Normalized level:  $1.37 \cdot 10^3$ .

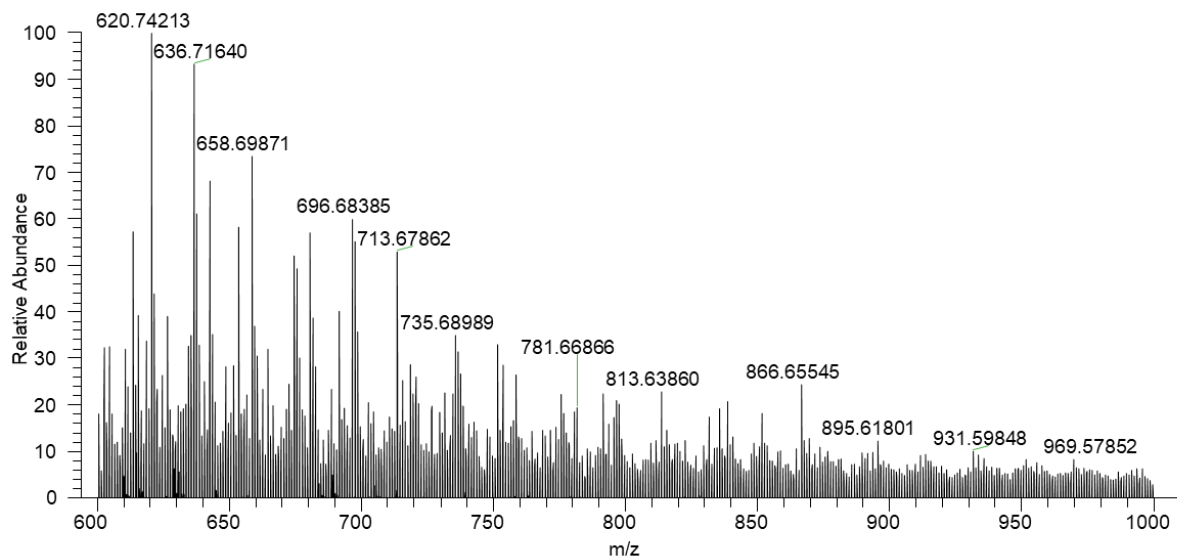

Supporting Figure 7: Single LDI mass spectrum from mouse brain cerebellum. All parameters were the same as for the imaging experiment shown in Figure 2e.

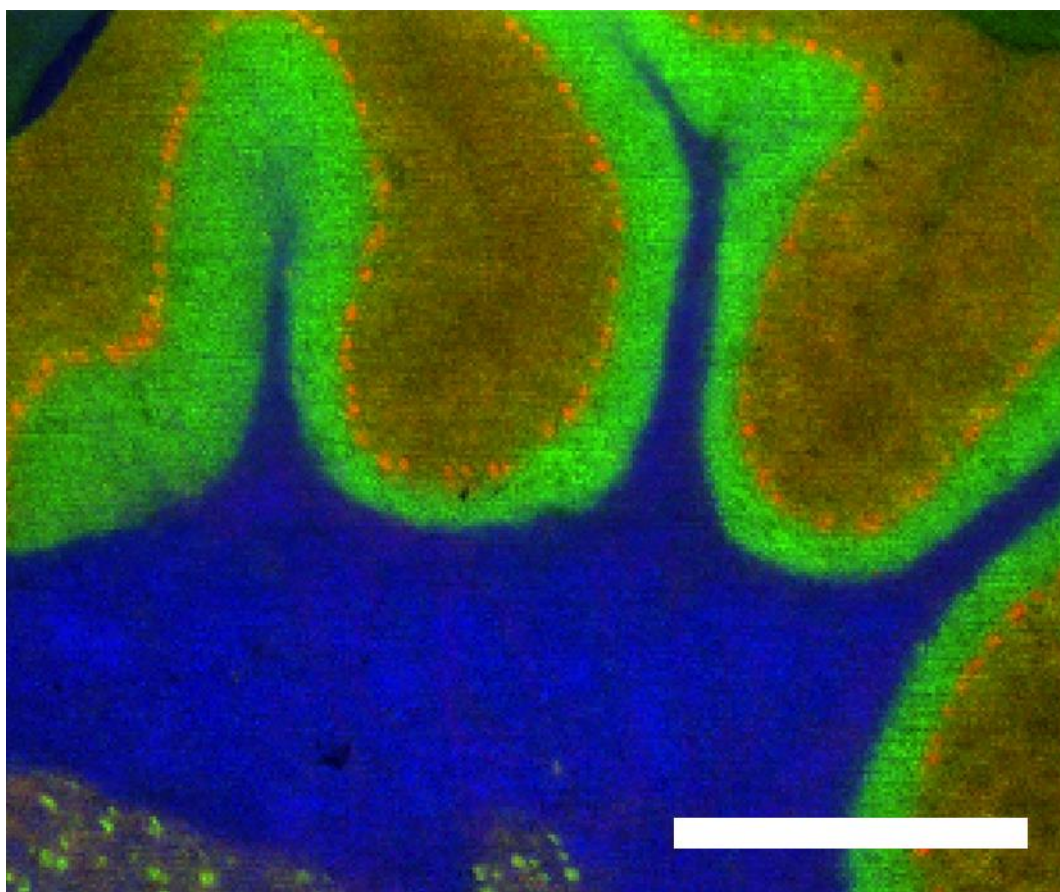

Supporting Figure 8: MALDI MS image of mouse brain cerebellum with 300x250 pixels and 5  $\mu\text{m}$  pixel size. Color coding: red:  $m/z$  872.5525 [SHexCer t38:2 + Na]<sup>+</sup>, green:  $m/z$  844.5212 [SHexCer t36:2 + Na]<sup>+</sup>, blue:  $m/z$  848.6329 [PS 40:0 + H]<sup>+</sup>. Markers of the Purkinje cells (red) were observed in the MALDI experiment, while being absent in the DIUTHAME measurements. Scale bar: 500  $\mu\text{m}$ .



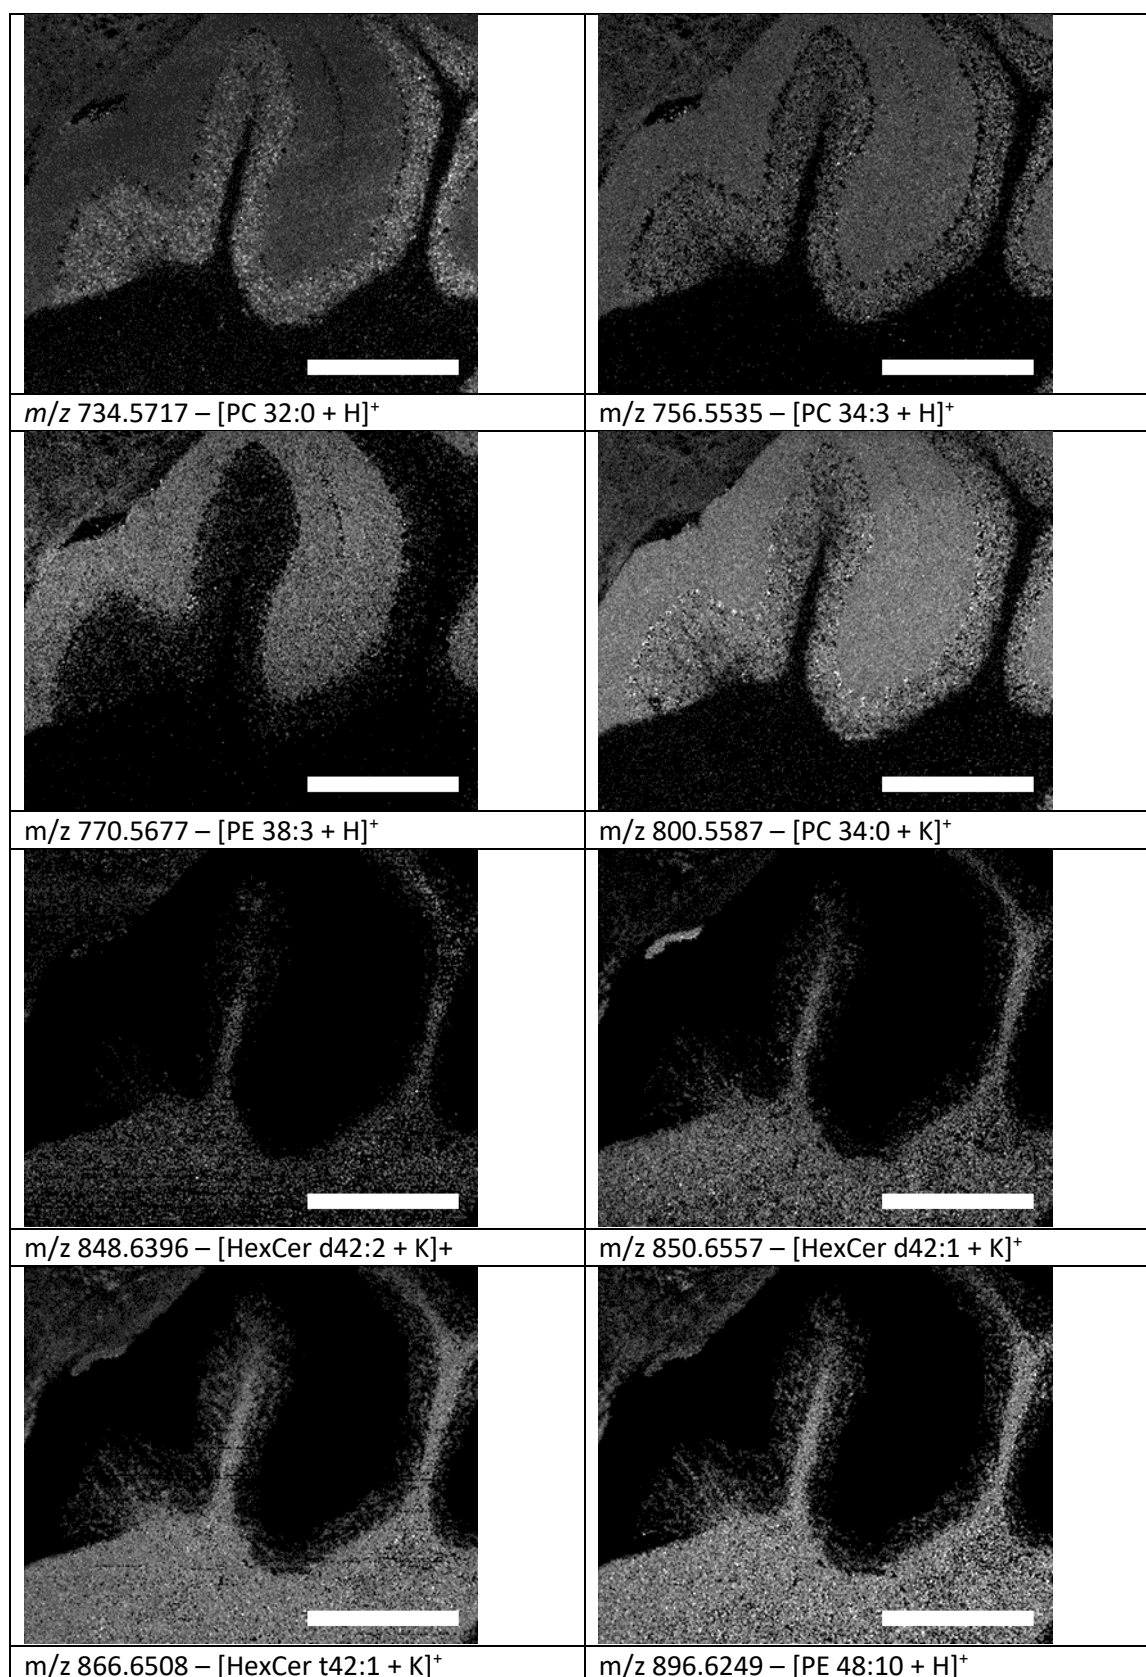

Supporting Figure 9: DIUTHAME MSI of a mouse brain cerebellum section in positive-ion mode. Pixel size: 5  $\mu\text{m}$ . Image size: 300x250 pixels. Scale bars: 500  $\mu\text{m}$ .

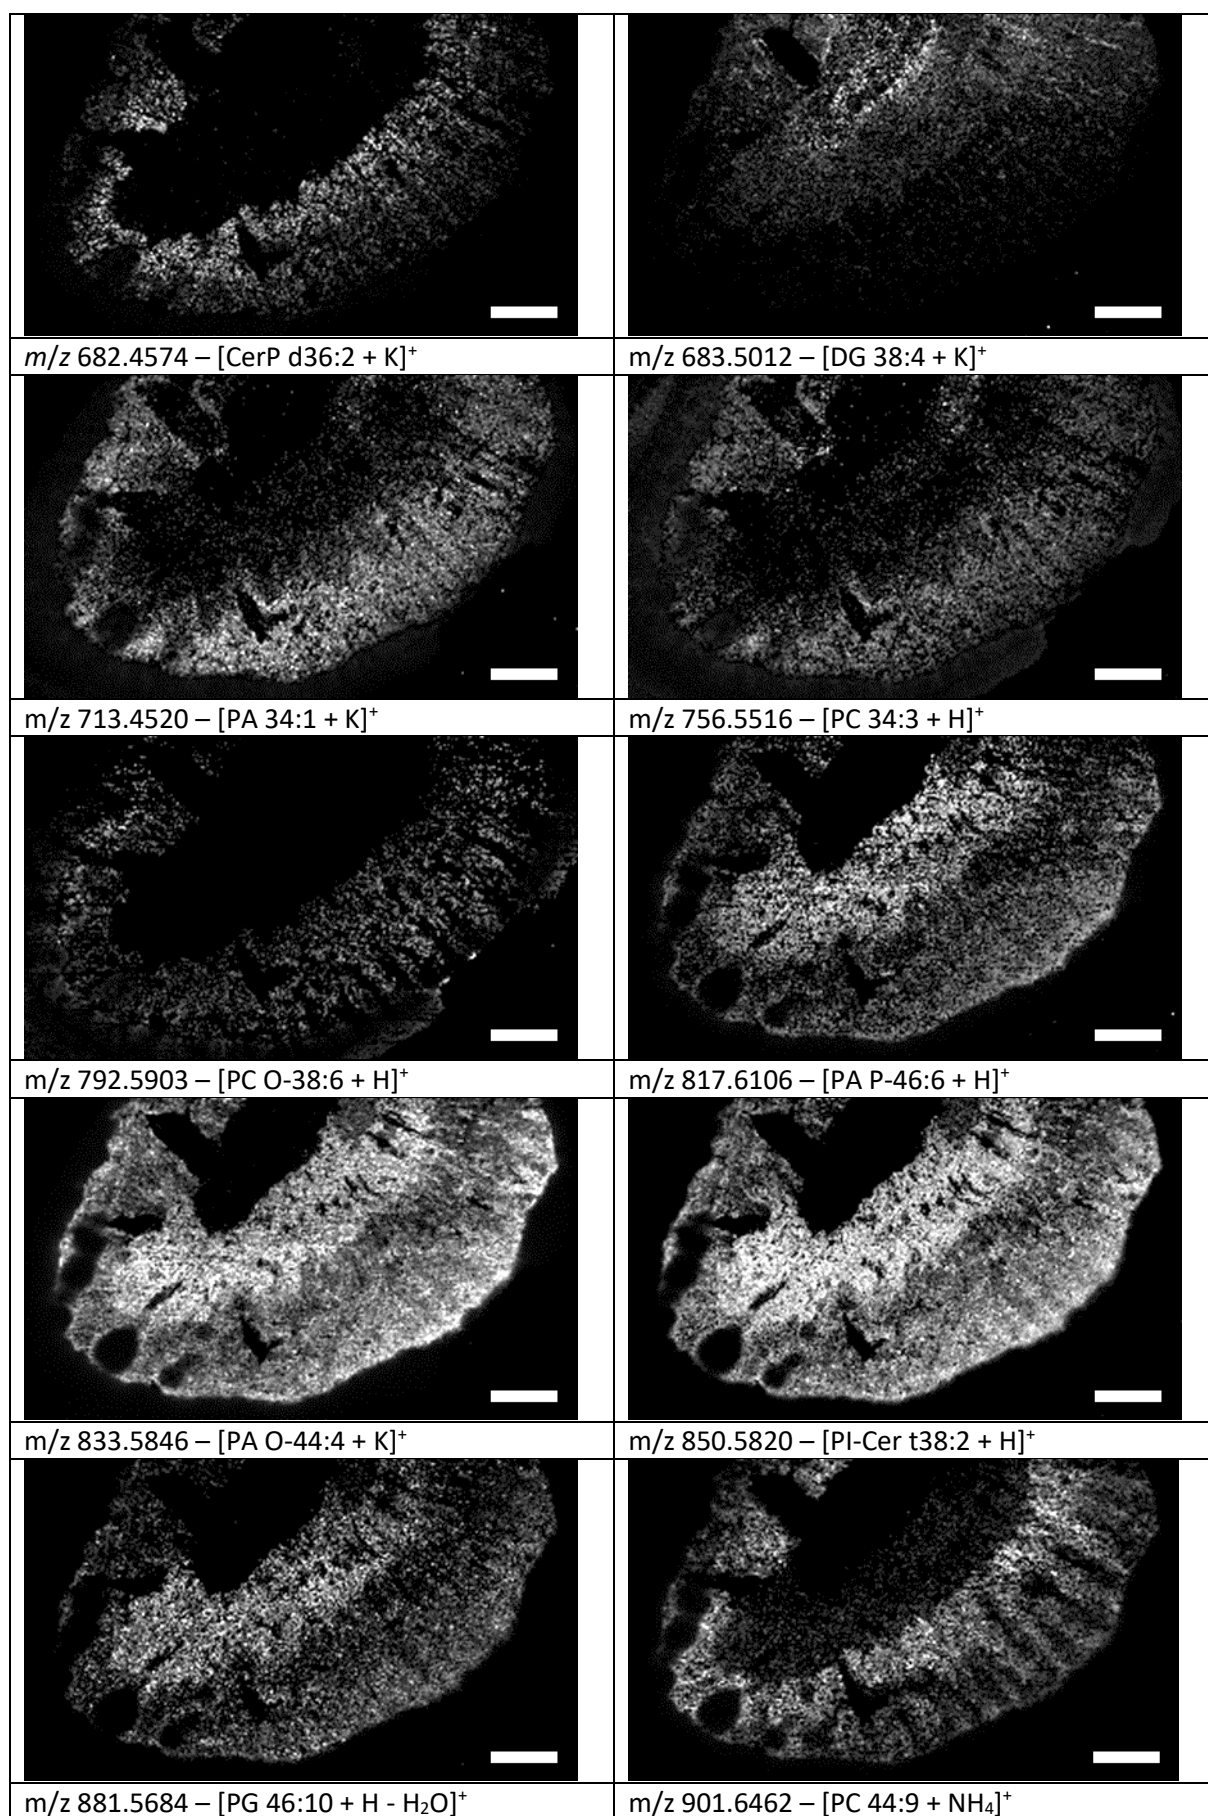

Supporting Figure 10: DIUTHAME MSI of a mouse kidney section in positive-ion mode. Pixel size: 30  $\mu\text{m}$ . Image size: 276x161 pixels. Scale bar: 1 mm.



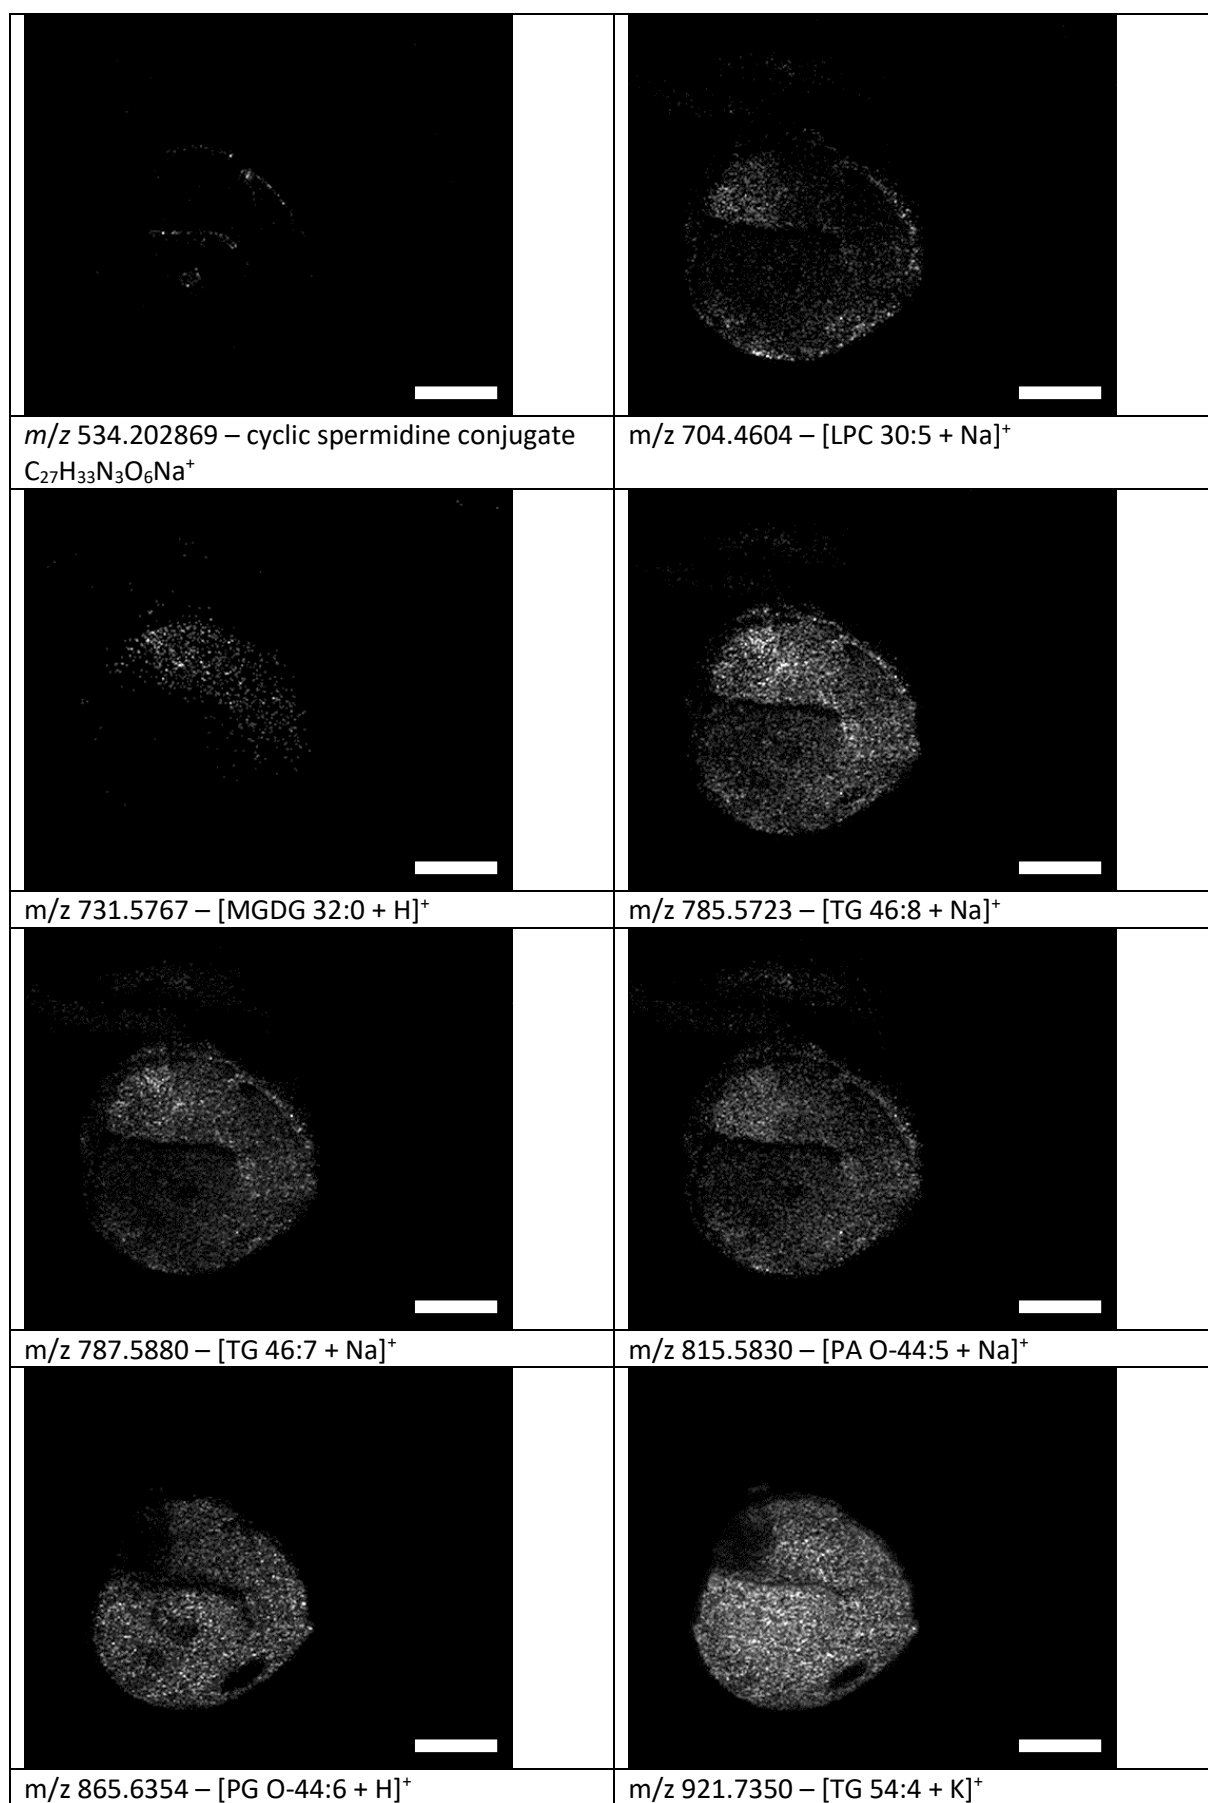

Supporting Figure 11: DIUTHAME MSI of a germinating rapeseed section in positive-ion mode. Pixel size: 20  $\mu$ m. Image size: 297x245 pixels. Scale bar: 1 mm.



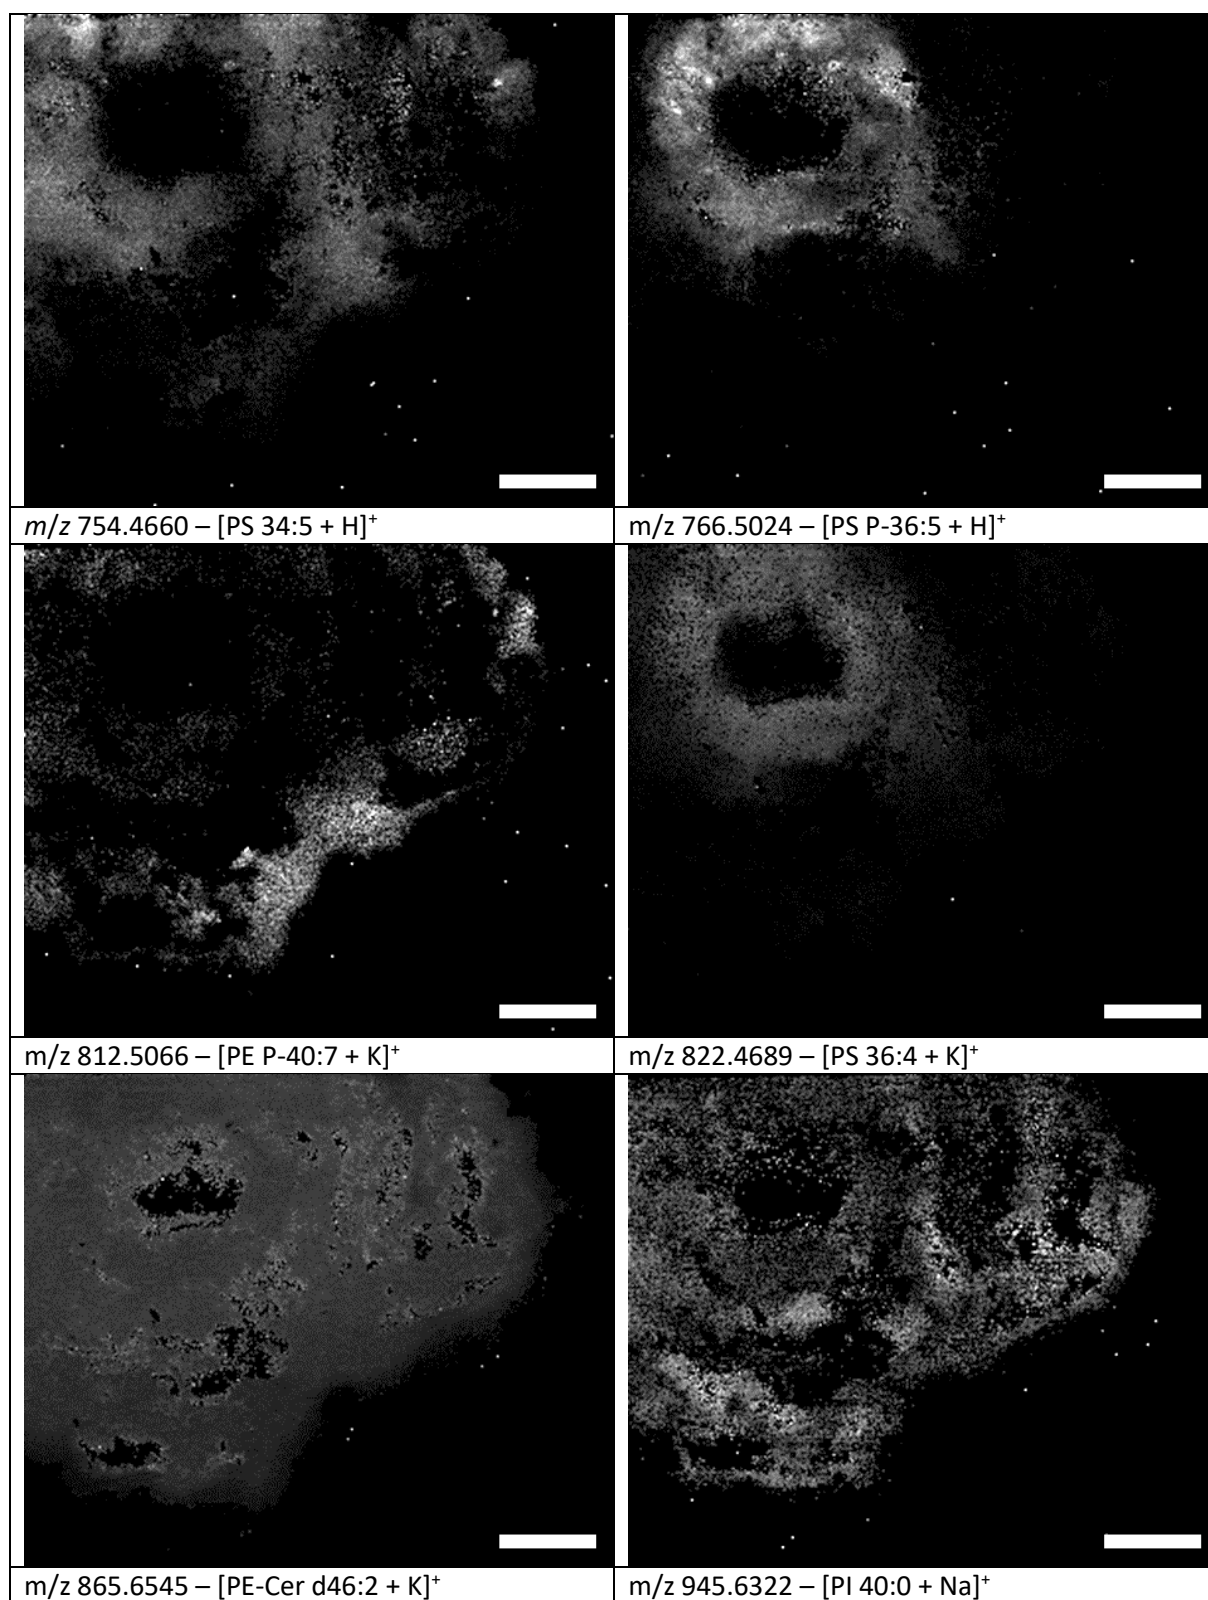

Supporting Figure 12: DIUTHAME MSI of a *Spodoptera littoralis* larva section in positive-ion mode. Pixel size: 20  $\mu\text{m}$ . Image size: 300x250 pixels. Scale bar: 1mm.

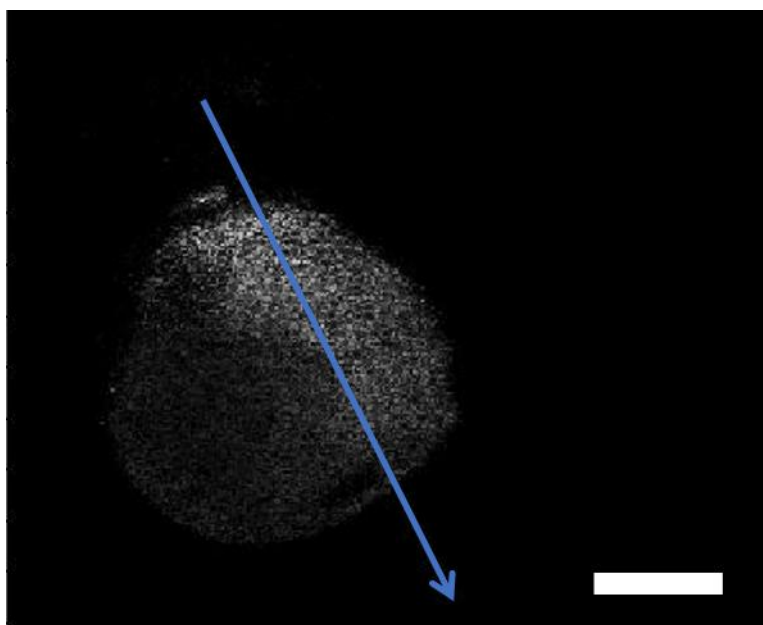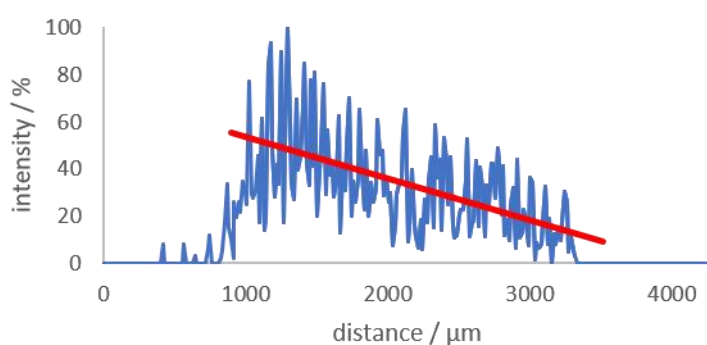

Supporting Figure 13: Line scan through a part of the rapeseed sample measured by DIUTHAME and shown in Figure 3 for  $m/z$  909.6985 [LacCer d36:0 +  $\text{NH}_4$ ] $^+$ , indicating a decrease of the compound from the root tip towards the endosperm. Linear regression for the linear part from 1100  $\mu\text{m}$  – 3320  $\mu\text{m}$  is overlaid. Direction and position of the line scan indicated by blue arrow. Scale bar: 1 mm.

Effective  
area

Scanned area  
after MSI  
experiment

Metal frame,  
adhesive at  
the backside

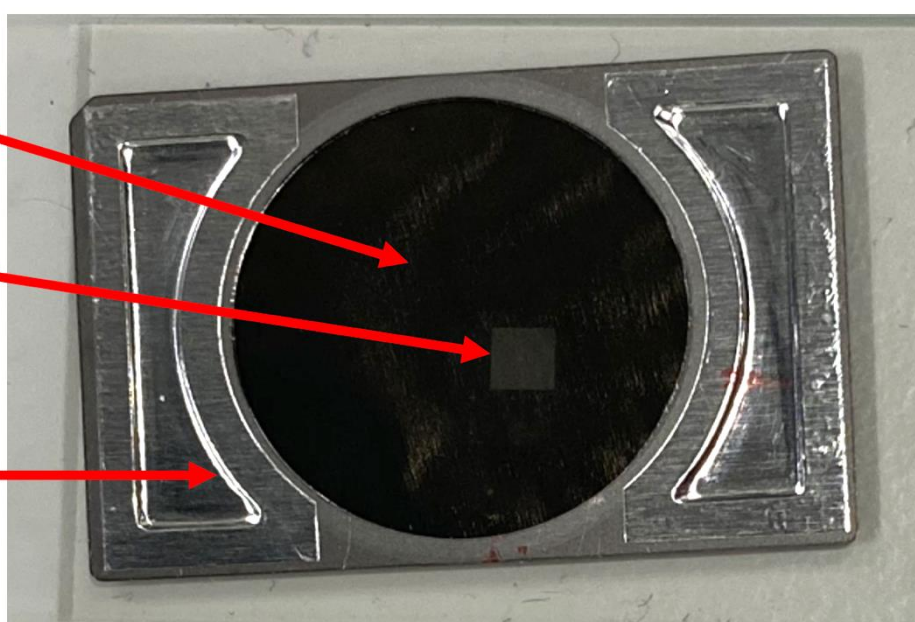

Supporting Figure 14: Optical image of the DIUTHAME membrane attached to a sample on a glass slide. The sample cannot be seen by eye, only under a microscope with transmitted light setting.

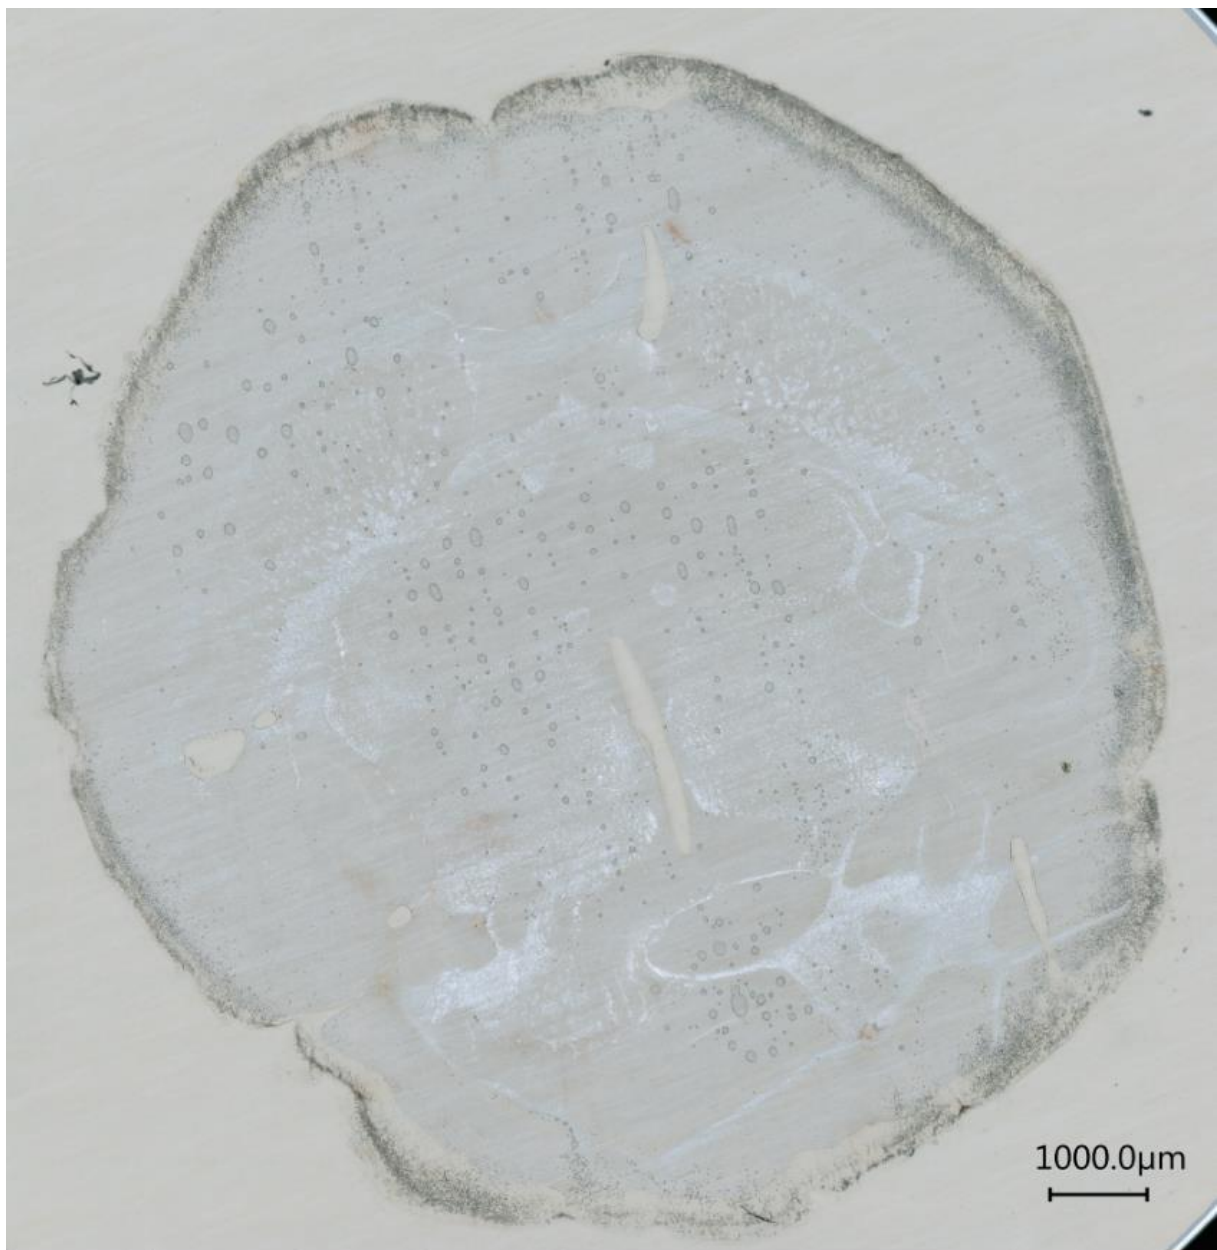

*Supporting Figure 15: Transmission light optical microscopy image of a horizontal mouse brain section with DIUTHAME membrane completely attached on top of the sample.*

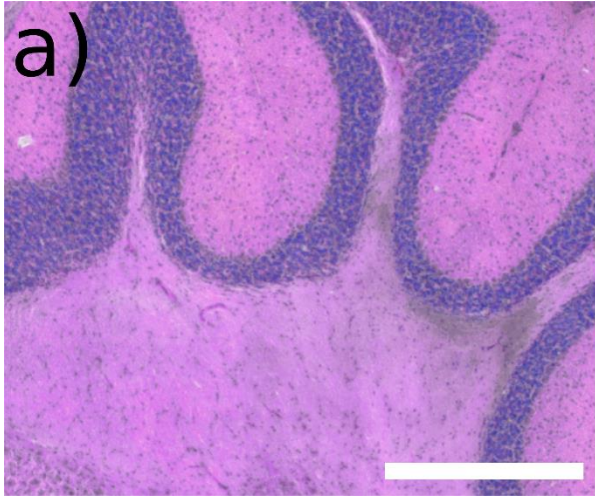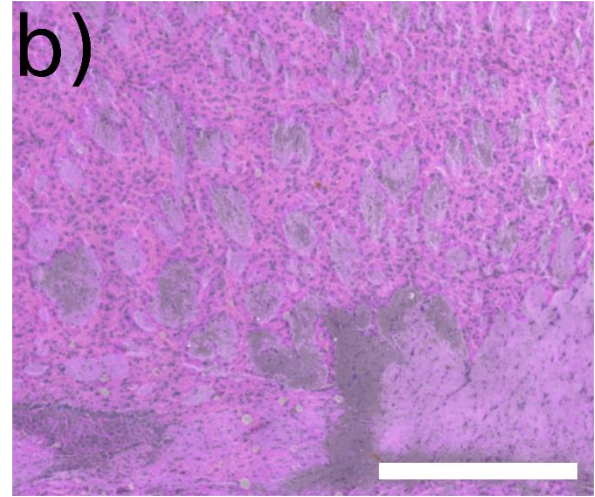

*Supporting Figure 16: Optical microscopy image of regions of a mouse brain section stained with hematoxylin and eosin after the MALDI MSI experiment shown in Figure 2. a) Region in cerebellum. b) Striatum ventral region. Scale bars: 500  $\mu\text{m}$ .*



Supporting Table 1: List of mass signals detected by DIUTHAME MS from mouse brain cerebellum and annotated by LIPIDMAPS in shorthand notation [1,2].

| Number | $m/z$ measured | $m/z$ literature | $\Delta m/z$ / ppm | annotated lipid | ion adduct          |
|--------|----------------|------------------|--------------------|-----------------|---------------------|
| 1      | 620.4278       | 620.4286         | 1.3                | PC(24:1)        | [M+H] <sup>+</sup>  |
| 2      | 650.4385       | 650.4391         | 0.9                | PE(28:1(OH))    | [M+H] <sup>+</sup>  |
| 3      | 660.3995       | 660.4000         | 0.8                | LPE(30:6)       | [M+Na] <sup>+</sup> |
| 4      | 672.4205       | 672.4211         | 0.9                | PE(28:1(OH))    | [M+Na] <sup>+</sup> |
| 5      | 678.4698       | 678.4704         | 0.9                | PE(30:1(OH))    | [M+H] <sup>+</sup>  |
| 6      | 686.4152       | 686.4158         | 0.9                | PC(26:1)        | [M+K] <sup>+</sup>  |
| 7      | 687.4356       | 687.4362         | 0.9                | PA(32:0)        | [M+K] <sup>+</sup>  |
| 8      | 688.4308       | 688.4313         | 0.7                | LPE(32:6)       | [M+Na] <sup>+</sup> |
| 9      | 697.4773       | 697.4779         | 0.9                | PA(34:1)        | [M+Na] <sup>+</sup> |
| 10     | 700.4518       | 700.4524         | 0.9                | PE(30:1(OH))    | [M+Na] <sup>+</sup> |
| 11     | 702.4101       | 702.4105         | 0.6                | PE(32:6)        | [M+Na] <sup>+</sup> |
| 12     | 710.4881       | 710.4885         | 0.6                | CerP(d38:2)     | [M+K] <sup>+</sup>  |
| 13     | 711.4357       | 711.4362         | 0.7                | PA(34:2)        | [M+K] <sup>+</sup>  |
| 14     | 713.4515       | 713.4518         | 0.4                | PA(34:1)        | [M+K] <sup>+</sup>  |
| 15     | 714.4548       | 714.4552         | 0.6                | PI-Cer(t28:0)   | [M+H] <sup>+</sup>  |
| 16     | 716.4258       | 716.4263         | 0.7                | PE(30:1(OH))    | [M+K] <sup>+</sup>  |
| 17     | 731.6058       | 731.6061         | 0.4                | SM(d36:1)       | [M+H] <sup>+</sup>  |
| 18     | 732.4208       | 732.4211         | 0.4                | LPS(32:6)       | [M+Na] <sup>+</sup> |
| 19     | 733.4242       | 733.4262         | 2.7                | LPI(26:1)       | [M+Na] <sup>+</sup> |
| 20     | 734.5692       | 734.5694         | 0.3                | PC(32:0)        | [M+H] <sup>+</sup>  |
| 21     | 739.4673       | 739.4675         | 0.3                | PA(36:2)        | [M+K] <sup>+</sup>  |
| 22     | 740.4706       | 740.4708         | 0.3                | PI-Cer(t30:1)   | [M+H] <sup>+</sup>  |
| 23     | 741.4828       | 741.4831         | 0.4                | PA(36:1)        | [M+K] <sup>+</sup>  |
| 24     | 742.4862       | 742.4865         | 0.4                | PI-Cer(t30:0)   | [M+H] <sup>+</sup>  |
| 25     | 744.4572       | 744.4575         | 0.4                | PC(32:6)        | [M+Na] <sup>+</sup> |
| 26     | 748.5846       | 748.5851         | 0.7                | PE(36:0)        | [M+H] <sup>+</sup>  |
| 27     | 753.5877       | 753.5881         | 0.5                | SM(d36:1)       | [M+Na] <sup>+</sup> |
| 28     | 756.4937       | 756.494          | 0.4                | PE(34:1)        | [M+K] <sup>+</sup>  |
| 29     | 756.5510       | 756.5514         | 0.5                | PC(32:0)        | [M+Na] <sup>+</sup> |
| 30     | 758.5093       | 758.5095         | 0.3                | LPC(34:6)       | [M+Na] <sup>+</sup> |
| 31     | 760.5849       | 760.5851         | 0.3                | PC(34:1)        | [M+H] <sup>+</sup>  |
| 32     | 762.6003       | 762.6007         | 0.5                | PC(34:0)        | [M+H] <sup>+</sup>  |
| 33     | 766.5590       | 766.5593         | 0.4                | PS(O-34:0(OH))  | [M+H] <sup>+</sup>  |
| 34     | 767.4985       | 767.4988         | 0.4                | PA(38:2)        | [M+K] <sup>+</sup>  |
| 35     | 769.5619       | 769.5620         | 0.1                | SM(d36:1)       | [M+K] <sup>+</sup>  |
| 36     | 770.5094       | 770.5095         | 0.1                | PE(P-38:6)      | [M+Na] <sup>+</sup> |
| 37     | 770.5652       | 770.5670         | 2.3                | PE(36:0)        | [M+Na] <sup>+</sup> |
| 38     | 772.5251       | 772.5252         | 0.1                | PE(O-38:6)      | [M+Na] <sup>+</sup> |
| 39     | 773.5285       | 773.5303         | 2.3                | PG(34:0)        | [M+Na] <sup>+</sup> |
| 40     | 775.5265       | 775.5272         | 0.9                | PA(42:7)        | [M+H] <sup>+</sup>  |
| 41     | 782.5095       | 782.5097         | 0.3                | PE(36:2)        | [M+K] <sup>+</sup>  |
| 42     | 782.5541       | 782.5542         | 0.1                | PI-Cer(d34:0)   | [M+H] <sup>+</sup>  |

|    |          |          |       |                |                     |
|----|----------|----------|-------|----------------|---------------------|
| 43 | 782.5670 | 782.5670 | < 0.1 | PC(34:1)       | [M+Na] <sup>+</sup> |
| 44 | 784.5251 | 784.5253 | 0.3   | PE(36:1)       | [M+K] <sup>+</sup>  |
| 45 | 784.5824 | 784.5827 | 0.4   | PC(34:0)       | [M+Na] <sup>+</sup> |
| 46 | 786.5407 | 786.5408 | 0.1   | PC(P-36:5)     | [M+Na] <sup>+</sup> |
| 47 | 788.6163 | 788.6164 | 0.1   | PC(36:1)       | [M+H] <sup>+</sup>  |
| 48 | 796.5252 | 796.5252 | < 0.1 | PE(P-40:7)     | [M+Na] <sup>+</sup> |
| 49 | 797.5932 | 797.5933 | 0.1   | SM(d38:1)      | [M+K] <sup>+</sup>  |
| 50 | 798.5410 | 798.5410 | < 0.1 | PC(34:1)       | [M+K] <sup>+</sup>  |
| 51 | 799.5444 | 799.5460 | 2.0   | PG(36:1)       | [M+Na] <sup>+</sup> |
| 52 | 800.5566 | 800.5566 | < 0.1 | PC(34:0)       | [M+K] <sup>+</sup>  |
| 53 | 801.5599 | 801.5616 | 2.1   | PG(36:0)       | [M+Na] <sup>+</sup> |
| 54 | 806.5090 | 806.5097 | 0.9   | PE(38:4)       | [M+K] <sup>+</sup>  |
| 55 | 808.5696 | 808.5698 | 0.2   | PI-Cer(d36:1)  | [M+H] <sup>+</sup>  |
| 56 | 810.5855 | 810.5855 | < 0.1 | PI-Cer(d36:0)  | [M+H] <sup>+</sup>  |
| 57 | 810.5985 | 810.5983 | 0.2   | PC(36:1)       | [M+Na] <sup>+</sup> |
| 58 | 814.5358 | 814.5359 | 0.1   | PC(34:1(OH))   | [M+K] <sup>+</sup>  |
| 59 | 822.6218 | 822.6219 | 0.1   | PS(O-38:0(OH)) | [M+H] <sup>+</sup>  |
| 60 | 822.6427 | 822.6429 | 0.2   | HexCer(t40:1)  | [M+Na] <sup>+</sup> |
| 61 | 824.5566 | 824.5566 | < 0.1 | PC(36:2)       | [M+K] <sup>+</sup>  |
| 62 | 826.5724 | 826.5723 | 0.1   | PC(36:1)       | [M+K] <sup>+</sup>  |
| 63 | 827.5757 | 827.5773 | 1.9   | PG(38:1)       | [M+Na] <sup>+</sup> |
| 64 | 828.5151 | 828.5151 | < 0.1 | PS(36:1)       | [M+K] <sup>+</sup>  |
| 65 | 830.5097 | 830.5097 | < 0.1 | PE(40:6)       | [M+K] <sup>+</sup>  |
| 66 | 832.5100 | 832.5099 | 0.1   | PS(38:5)       | [M+Na] <sup>+</sup> |
| 67 | 836.6009 | 836.6011 | 0.2   | PI-Cer(d38:1)  | [M+H] <sup>+</sup>  |
| 68 | 838.6168 | 838.6168 | < 0.1 | PI-Cer(d38:0)  | [M+H] <sup>+</sup>  |
| 69 | 840.6230 | 840.6243 | 1.5   | CerP(t46:1)    | [M+K] <sup>+</sup>  |
| 70 | 840.6325 | 840.6325 | < 0.1 | HexCer(t40:0)  | [M+K] <sup>+</sup>  |
| 71 | 846.5254 | 846.5257 | 0.4   | PI-Cer(d36:1)  | [M+K] <sup>+</sup>  |
| 72 | 848.6375 | 848.6375 | < 0.1 | PS(40:0)       | [M+H] <sup>+</sup>  |
| 73 | 850.6532 | 850.6532 | < 0.1 | PS(O-40:0(OH)) | [M+H] <sup>+</sup>  |
| 74 | 850.6739 | 850.6742 | 0.4   | HexCer(t42:1)  | [M+Na] <sup>+</sup> |
| 75 | 864.6324 | 864.6324 | < 0.1 | PI-Cer(d40:1)  | [M+H] <sup>+</sup>  |
| 76 | 866.6483 | 866.6482 | 0.1   | HexCer(t42:1)  | [M+K] <sup>+</sup>  |
| 77 | 868.6546 | 868.6556 | 1.2   | CerP(t48:1)    | [M+K] <sup>+</sup>  |

Supporting Table 2: List of mass signals detected by MALDI MS from mouse brain cerebellum and annotated by LIPIDMAPS in shorthand notation [1,2].

| Number | $m/z$ measured | $m/z$ literature | $\Delta m/z$ / ppm | annotated lipid | ion adduct          |
|--------|----------------|------------------|--------------------|-----------------|---------------------|
| 1      | 606.4141       | 606.4129         | 2.0                | PE(26:1)        | [M+H] <sup>+</sup>  |
| 2      | 620.4295       | 620.4286         | 1.5                | PC(24:1)        | [M+H] <sup>+</sup>  |
| 3      | 622.4451       | 622.4442         | 1.4                | PC(24:0)        | [M+H] <sup>+</sup>  |
| 4      | 633.4868       | 633.4855         | 2.1                | DG(34:1)        | [M+K] <sup>+</sup>  |
| 5      | 634.4451       | 634.4442         | 1.4                | PE(28:1)        | [M+H] <sup>+</sup>  |
| 6      | 642.4113       | 642.4105         | 1.2                | PC(24:1)        | [M+Na] <sup>+</sup> |
| 7      | 644.4271       | 644.4262         | 1.4                | PC(24:0)        | [M+Na] <sup>+</sup> |
| 8      | 648.4607       | 648.4599         | 1.2                | PC(26:1)        | [M+H] <sup>+</sup>  |
| 9      | 650.4399       | 650.4391         | 1.2                | PE(28:1(OH))    | [M+H] <sup>+</sup>  |
| 10     | 650.4762       | 650.4755         | 1.1                | PC(26:0)        | [M+H] <sup>+</sup>  |
| 11     | 652.4192       | 652.4185         | 1.1                | HexCer(d28:2)   | [M+K] <sup>+</sup>  |
| 12     | 656.4269       | 656.4262         | 1.1                | PE(28:1)        | [M+Na] <sup>+</sup> |
| 13     | 661.4042       | 661.4051         | 1.4                | PG(26:0)        | [M+Na] <sup>+</sup> |
| 14     | 661.5176       | 661.5168         | 1.2                | DG(36:1)        | [M+K] <sup>+</sup>  |
| 15     | 664.4555       | 664.4548         | 1.1                | LPS(28:1)       | [M+H] <sup>+</sup>  |
| 16     | 667.4381       | 667.4392         | 1.6                | MGDG(26:1)      | [M+Na] <sup>+</sup> |
| 17     | 668.4140       | 668.4133         | 1.0                | PI-Cer(d26:1)   | [M+H] <sup>+</sup>  |
| 18     | 670.4425       | 670.4418         | 1.0                | PC(26:1)        | [M+Na] <sup>+</sup> |
| 19     | 672.4218       | 672.4211         | 1.0                | PE(28:1(OH))    | [M+Na] <sup>+</sup> |
| 20     | 672.4582       | 672.4575         | 1.0                | PC(26:0)        | [M+Na] <sup>+</sup> |
| 21     | 674.4160       | 674.4158         | 0.3                | PE(28:0)        | [M+K] <sup>+</sup>  |
| 22     | 678.4708       | 678.4704         | 0.6                | PE(30:1(OH))    | [M+H] <sup>+</sup>  |
| 23     | 680.4502       | 680.4498         | 0.6                | HexCer(d30:2)   | [M+K] <sup>+</sup>  |
| 24     | 682.4580       | 682.4572         | 1.2                | CerP(d36:2)     | [M+K] <sup>+</sup>  |
| 25     | 683.5022       | 683.5011         | 1.6                | DG(38:4)        | [M+K] <sup>+</sup>  |
| 26     | 684.4738       | 684.4729         | 1.3                | CerP(d36:1)     | [M+K] <sup>+</sup>  |
| 27     | 685.4048       | 685.4051         | 0.4                | PG(28:2)        | [M+Na] <sup>+</sup> |
| 28     | 685.4215       | 685.4205         | 1.5                | PA(32:1)        | [M+K] <sup>+</sup>  |
| 29     | 686.4161       | 686.4158         | 0.4                | PC(26:1)        | [M+K] <sup>+</sup>  |
| 30     | 687.4200       | 687.4208         | 1.2                | PG(28:1)        | [M+Na] <sup>+</sup> |
| 31     | 687.4371       | 687.4362         | 1.3                | PA(32:0)        | [M+K] <sup>+</sup>  |
| 32     | 688.4314       | 688.4314         | < 0.1              | PC(26:0)        | [M+K] <sup>+</sup>  |
| 33     | 689.4197       | 689.4177         | 2.9                | PA(36:8)        | [M+H] <sup>+</sup>  |
| 34     | 689.4349       | 689.4364         | 2.2                | PG(28:0)        | [M+Na] <sup>+</sup> |
| 35     | 692.4864       | 692.4861         | 0.4                | LPS(30:1)       | [M+H] <sup>+</sup>  |
| 36     | 693.4456       | 693.4466         | 1.4                | PA(34:3)        | [M+Na] <sup>+</sup> |
| 37     | 694.5155       | 694.5146         | 1.3                | CerP(d38:2)     | [M+Na] <sup>+</sup> |
| 38     | 695.4422       | 695.4412         | 1.4                | PA(O-34:3)      | [M+K] <sup>+</sup>  |
| 39     | 695.4687       | 695.4705         | 2.6                | MGDG(28:1)      | [M+Na] <sup>+</sup> |
| 40     | 696.4449       | 696.4447         | 0.3                | HexCer(t30:2)   | [M+K] <sup>+</sup>  |
| 41     | 697.4789       | 697.4779         | 1.4                | PA(34:1)        | [M+Na] <sup>+</sup> |
| 42     | 698.4163       | 698.4158         | 0.7                | PE(30:2)        | [M+K] <sup>+</sup>  |

|    |          |          |       |               |                     |
|----|----------|----------|-------|---------------|---------------------|
| 43 | 699.4853 | 699.4838 | 2.1   | PE-Cer(d34:1) | [M+K] <sup>+</sup>  |
| 44 | 700.4319 | 700.4314 | 0.7   | PE(30:1)      | [M+K] <sup>+</sup>  |
| 45 | 700.4529 | 700.4524 | 0.7   | PE(30:1(OH))  | [M+Na] <sup>+</sup> |
| 46 | 701.4549 | 701.4542 | 1.0   | DG(40:9)      | [M+K] <sup>+</sup>  |
| 47 | 702.4110 | 702.4107 | 0.4   | LPS(28:1)     | [M+K] <sup>+</sup>  |
| 48 | 703.4144 | 703.4157 | 1.8   | PG(28:1(OH))  | [M+Na] <sup>+</sup> |
| 49 | 706.5386 | 706.5381 | 0.7   | PC(30:0)      | [M+H] <sup>+</sup>  |
| 50 | 707.5021 | 707.5011 | 1.4   | DG(40:6)      | [M+K] <sup>+</sup>  |
| 51 | 708.4813 | 708.4811 | 0.3   | HexCer(d32:2) | [M+K] <sup>+</sup>  |
| 52 | 709.4192 | 709.4191 | 0.1   | SQDG(26:1)    | [M+H] <sup>+</sup>  |
| 53 | 710.4744 | 710.4755 | 1.5   | PE(34:5)      | [M+H] <sup>+</sup>  |
| 54 | 710.4892 | 710.4885 | 1.0   | CerP(d38:2)   | [M+K] <sup>+</sup>  |
| 55 | 711.4197 | 711.4208 | 1.5   | PG(30:3)      | [M+Na] <sup>+</sup> |
| 56 | 711.4372 | 711.4362 | 1.4   | PA(34:2)      | [M+K] <sup>+</sup>  |
| 57 | 712.4317 | 712.4314 | 0.4   | PC(28:2)      | [M+K] <sup>+</sup>  |
| 58 | 712.4410 | 712.4395 | 2.1   | PI-Cer(t28:1) | [M+H] <sup>+</sup>  |
| 59 | 712.4877 | 712.4888 | 1.5   | PE(32:1)      | [M+Na] <sup>+</sup> |
| 60 | 713.4367 | 713.4364 | 0.4   | PG(30:2)      | [M+Na] <sup>+</sup> |
| 61 | 713.4525 | 713.4518 | 1.0   | PA(34:1)      | [M+K] <sup>+</sup>  |
| 62 | 714.4111 | 714.4107 | 0.6   | PE(30:2(OH))  | [M+K] <sup>+</sup>  |
| 63 | 714.4563 | 714.4552 | 1.5   | PI-Cer(t28:0) | [M+H] <sup>+</sup>  |
| 64 | 715.4505 | 715.4521 | 2.2   | PG(30:1)      | [M+Na] <sup>+</sup> |
| 65 | 716.4267 | 716.4263 | 0.6   | PE(30:1(OH))  | [M+K] <sup>+</sup>  |
| 66 | 716.4622 | 716.4626 | 0.6   | LPE(34:6)     | [M+Na] <sup>+</sup> |
| 67 | 717.4505 | 717.4490 | 2.1   | PA(38:8)      | [M+H] <sup>+</sup>  |
| 68 | 718.4061 | 718.4056 | 0.7   | PS(28:0)      | [M+K] <sup>+</sup>  |
| 69 | 718.4245 | 718.4266 | 2.9   | PI-Cer(d28:1) | [M+Na] <sup>+</sup> |
| 70 | 719.4609 | 719.4622 | 1.8   | PA(36:4)      | [M+Na] <sup>+</sup> |
| 71 | 720.5546 | 720.5538 | 1.1   | PE(34:0)      | [M+H] <sup>+</sup>  |
| 72 | 721.4781 | 721.4779 | 0.3   | PA(36:3)      | [M+Na] <sup>+</sup> |
| 73 | 723.4744 | 723.4725 | 2.6   | PA(O-36:3)    | [M+K] <sup>+</sup>  |
| 74 | 723.4942 | 723.4935 | 1.0   | PA(36:2)      | [M+Na] <sup>+</sup> |
| 75 | 724.4762 | 724.4760 | 0.3   | HexCer(t32:2) | [M+K] <sup>+</sup>  |
| 76 | 725.4884 | 725.4882 | 0.3   | PA(O-36:2)    | [M+K] <sup>+</sup>  |
| 77 | 725.5105 | 725.5116 | 1.5   | PA(38:4)      | [M+H] <sup>+</sup>  |
| 78 | 725.5577 | 725.5568 | 1.2   | SM(d34:1)     | [M+Na] <sup>+</sup> |
| 79 | 726.4110 | 726.4107 | 0.4   | LPS(30:3)     | [M+K] <sup>+</sup>  |
| 80 | 726.4476 | 726.4471 | 0.7   | PE(32:2)      | [M+K] <sup>+</sup>  |
| 81 | 726.4916 | 726.4916 | < 0.1 | PI-Cer(d30:0) | [M+H] <sup>+</sup>  |
| 82 | 727.4683 | 727.4673 | 1.4   | PA(P-38:6)    | [M+Na] <sup>+</sup> |
| 83 | 728.4266 | 728.4263 | 0.4   | LPS(30:2)     | [M+K] <sup>+</sup>  |
| 84 | 728.4629 | 728.4627 | 0.3   | PE(32:1)      | [M+K] <sup>+</sup>  |
| 85 | 728.4844 | 728.4837 | 1.0   | PE(32:1(OH))  | [M+Na] <sup>+</sup> |
| 86 | 728.5207 | 728.5201 | 0.8   | PC(30:0)      | [M+Na] <sup>+</sup> |
| 87 | 730.5749 | 730.5745 | 0.5   | PE(O-36:2)    | [M+H] <sup>+</sup>  |



|     |          |          |     |               |                     |
|-----|----------|----------|-----|---------------|---------------------|
| 88  | 731.6068 | 731.6061 | 1.0 | SM(d36:1)     | [M+H] <sup>+</sup>  |
| 89  | 732.4215 | 732.4211 | 0.5 | LPS(32:6)     | [M+Na] <sup>+</sup> |
| 90  | 732.5545 | 732.5538 | 1.0 | PC(32:1)      | [M+H] <sup>+</sup>  |
| 91  | 733.4245 | 733.4262 | 2.3 | LPI(26:1)     | [M+Na] <sup>+</sup> |
| 92  | 734.4199 | 734.4215 | 2.2 | PI-Cer(t28:1) | [M+Na] <sup>+</sup> |
| 93  | 734.5701 | 734.5694 | 1.0 | PC(32:0)      | [M+H] <sup>+</sup>  |
| 94  | 735.4345 | 735.4348 | 0.4 | SQDG(28:2)    | [M+H] <sup>+</sup>  |
| 95  | 736.4377 | 736.4371 | 0.8 | PI-Cer(t28:0) | [M+Na] <sup>+</sup> |
| 96  | 737.4521 | 737.4518 | 0.4 | PA(36:3)      | [M+K] <sup>+</sup>  |
| 97  | 738.4114 | 738.4107 | 0.9 | PE(32:4(OH))  | [M+K] <sup>+</sup>  |
| 98  | 738.4551 | 738.4552 | 0.1 | PI-Cer(t30:2) | [M+H] <sup>+</sup>  |
| 99  | 738.5205 | 738.5198 | 0.9 | CerP(d40:2)   | [M+K] <sup>+</sup>  |
| 100 | 739.4510 | 739.4521 | 1.5 | PG(32:3)      | [M+Na] <sup>+</sup> |
| 101 | 739.4680 | 739.4675 | 0.7 | PA(36:2)      | [M+K] <sup>+</sup>  |
| 102 | 740.4119 | 740.4109 | 1.4 | PS(30:3(OH))  | [M+Na] <sup>+</sup> |
| 103 | 740.4717 | 740.4708 | 1.2 | PI-Cer(t30:1) | [M+H] <sup>+</sup>  |
| 104 | 740.4986 | 740.4991 | 0.7 | PE(O-34:2)    | [M+K] <sup>+</sup>  |
| 105 | 740.5203 | 740.5201 | 0.3 | PE(34:1)      | [M+Na] <sup>+</sup> |
| 106 | 741.4487 | 741.4490 | 0.4 | PA(40:10)     | [M+H] <sup>+</sup>  |
| 107 | 741.4676 | 741.4677 | 0.1 | PG(32:2)      | [M+Na] <sup>+</sup> |
| 108 | 741.4846 | 741.4831 | 2.0 | PA(36:1)      | [M+K] <sup>+</sup>  |
| 109 | 741.5311 | 741.5307 | 0.5 | SM(d34:1)     | [M+K] <sup>+</sup>  |
| 110 | 742.4065 | 742.4056 | 1.2 | PS(30:2)      | [M+K] <sup>+</sup>  |
| 111 | 742.4424 | 742.4420 | 0.5 | PE(32:2(OH))  | [M+K] <sup>+</sup>  |
| 112 | 742.4875 | 742.4865 | 1.3 | PI-Cer(t30:0) | [M+H] <sup>+</sup>  |
| 113 | 742.5155 | 742.5147 | 1.1 | PE(O-34:1)    | [M+K] <sup>+</sup>  |
| 114 | 742.5351 | 742.5357 | 0.8 | PE(34:0)      | [M+Na] <sup>+</sup> |
| 115 | 743.4818 | 743.4834 | 2.2 | PG(32:1)      | [M+Na] <sup>+</sup> |
| 116 | 744.4578 | 744.4576 | 0.3 | PE(32:1(OH))  | [M+K] <sup>+</sup>  |
| 117 | 744.4946 | 744.4940 | 0.8 | PC(30:0)      | [M+K] <sup>+</sup>  |
| 118 | 744.5540 | 744.5538 | 0.3 | PE(36:2)      | [M+H] <sup>+</sup>  |
| 119 | 745.4778 | 745.4779 | 0.1 | PA(38:5)      | [M+Na] <sup>+</sup> |
| 120 | 745.4978 | 745.4990 | 1.6 | PG(32:0)      | [M+Na] <sup>+</sup> |
| 121 | 745.6227 | 745.6218 | 1.2 | PE-Cer(d40:1) | [M+H] <sup>+</sup>  |
| 122 | 746.5701 | 746.5694 | 0.9 | PE(36:1)      | [M+H] <sup>+</sup>  |
| 123 | 746.6061 | 746.6058 | 0.4 | CerP(t42:1)   | [M+H] <sup>+</sup>  |
| 124 | 747.4714 | 747.4725 | 1.5 | PA(O-38:5)    | [M+K] <sup>+</sup>  |
| 125 | 747.4929 | 747.4935 | 0.8 | PA(38:4)      | [M+Na] <sup>+</sup> |
| 126 | 748.5858 | 748.5851 | 0.9 | PE(36:0)      | [M+H] <sup>+</sup>  |
| 127 | 749.5100 | 749.5092 | 1.1 | PA(38:3)      | [M+Na] <sup>+</sup> |
| 128 | 750.5421 | 750.5432 | 1.5 | PE(O-38:6)    | [M+H] <sup>+</sup>  |
| 129 | 750.5856 | 750.5854 | 0.3 | DGCC(32:0)    | [M+Na] <sup>+</sup> |
| 130 | 751.5252 | 751.5248 | 0.5 | PA(38:2)      | [M+Na] <sup>+</sup> |
| 131 | 751.5731 | 751.5724 | 0.9 | SM(d36:2)     | [M+Na] <sup>+</sup> |
| 132 | 752.4116 | 752.4111 | 0.7 | PI-Cer(t28:0) | [M+K] <sup>+</sup>  |

|     |          |          |       |                |                     |
|-----|----------|----------|-------|----------------|---------------------|
| 133 | 752.4271 | 752.4263 | 1.1   | LPS(32:4)      | [M+K] <sup>+</sup>  |
| 134 | 752.5074 | 752.5073 | 0.1   | HexCer(t34:2)  | [M+K] <sup>+</sup>  |
| 135 | 752.5571 | 752.5565 | 0.8   | PE(O-36:2)     | [M+Na] <sup>+</sup> |
| 136 | 753.4835 | 753.4855 | 2.7   | DG(44:11)      | [M+K] <sup>+</sup>  |
| 137 | 753.5886 | 753.5881 | 0.7   | SM(d36:1)      | [M+Na] <sup>+</sup> |
| 138 | 754.4788 | 754.4784 | 0.5   | PE(34:2)       | [M+K] <sup>+</sup>  |
| 139 | 754.5364 | 754.5357 | 0.9   | PC(32:1)       | [M+Na] <sup>+</sup> |
| 140 | 755.4070 | 755.4049 | 2.8   | PA(38:8)       | [M+K] <sup>+</sup>  |
| 141 | 755.4630 | 755.4624 | 0.8   | PA(36:2(OH))   | [M+K] <sup>+</sup>  |
| 142 | 755.4996 | 755.4986 | 1.3   | PA(P-40:6)     | [M+Na] <sup>+</sup> |
| 143 | 755.5446 | 755.5464 | 2.4   | PE-Cer(d38:1)  | [M+K] <sup>+</sup>  |
| 144 | 756.4944 | 756.4940 | 0.5   | PE(34:1)       | [M+K] <sup>+</sup>  |
| 145 | 756.5519 | 756.5514 | 0.7   | PC(32:0)       | [M+Na] <sup>+</sup> |
| 146 | 757.4192 | 757.4191 | 0.1   | SQDG(30:5)     | [M+H] <sup>+</sup>  |
| 147 | 758.4929 | 758.4943 | 1.8   | PS(32:0)       | [M+Na] <sup>+</sup> |
| 148 | 758.5104 | 758.5097 | 0.9   | PE(34:0)       | [M+K] <sup>+</sup>  |
| 149 | 758.5711 | 758.5694 | 2.2   | PC(34:2)       | [M+H] <sup>+</sup>  |
| 150 | 759.4360 | 759.4362 | 0.3   | PA(38:6)       | [M+K] <sup>+</sup>  |
| 151 | 759.6383 | 759.6374 | 1.2   | SM(d38:1)      | [M+H] <sup>+</sup>  |
| 152 | 760.4389 | 760.4371 | 2.4   | PI-Cer(t30:2)  | [M+Na] <sup>+</sup> |
| 153 | 760.4526 | 760.4524 | 0.3   | LPS(34:6)      | [M+Na] <sup>+</sup> |
| 154 | 760.5854 | 760.5851 | 0.4   | PC(34:1)       | [M+H] <sup>+</sup>  |
| 155 | 761.4507 | 761.4504 | 0.4   | SQDG(30:3)     | [M+H] <sup>+</sup>  |
| 156 | 762.4541 | 762.4528 | 1.7   | PI-Cer(t30:1)  | [M+Na] <sup>+</sup> |
| 157 | 762.4817 | 762.4834 | 2.2   | PE(O-36:5)     | [M+K] <sup>+</sup>  |
| 158 | 762.6026 | 762.6007 | 2.5   | PC(34:0)       | [M+H] <sup>+</sup>  |
| 159 | 763.4663 | 763.4661 | 0.3   | SQDG(30:2)     | [M+H] <sup>+</sup>  |
| 160 | 764.4695 | 764.4684 | 1.4   | PI-Cer(t30:0)  | [M+Na] <sup>+</sup> |
| 161 | 764.4986 | 764.4991 | 0.7   | PE(O-36:4)     | [M+K] <sup>+</sup>  |
| 162 | 765.4661 | 765.4677 | 2.1   | PG(34:4)       | [M+Na] <sup>+</sup> |
| 163 | 765.4840 | 765.4831 | 1.2   | PA(38:3)       | [M+K] <sup>+</sup>  |
| 164 | 766.4274 | 766.4266 | 1.0   | PS(32:4(OH))   | [M+Na] <sup>+</sup> |
| 165 | 766.4870 | 766.4865 | 0.7   | PI-Cer(t32:2)  | [M+H] <sup>+</sup>  |
| 166 | 766.5147 | 766.5147 | < 0.1 | PE(O-36:3)     | [M+K] <sup>+</sup>  |
| 167 | 766.5359 | 766.5357 | 0.3   | PE(36:2)       | [M+Na] <sup>+</sup> |
| 168 | 766.5592 | 766.5593 | 0.1   | PS(O-34:0(OH)) | [M+H] <sup>+</sup>  |
| 169 | 766.5786 | 766.5803 | 2.2   | HexCer(t36:1)  | [M+Na] <sup>+</sup> |
| 170 | 767.4820 | 767.4834 | 1.8   | PG(34:3)       | [M+Na] <sup>+</sup> |
| 171 | 767.4993 | 767.4988 | 0.7   | PA(38:2)       | [M+K] <sup>+</sup>  |
| 172 | 767.5178 | 767.5197 | 2.5   | PA(38:2(OH))   | [M+Na] <sup>+</sup> |
| 173 | 767.5468 | 767.5464 | 0.5   | SM(d36:2)      | [M+K] <sup>+</sup>  |
| 174 | 768.5030 | 768.5021 | 1.2   | PI-Cer(t32:1)  | [M+H] <sup>+</sup>  |
| 175 | 768.5306 | 768.5304 | 0.3   | PE(O-36:2)     | [M+K] <sup>+</sup>  |
| 176 | 768.5515 | 768.5514 | 0.1   | PE(36:1)       | [M+Na] <sup>+</sup> |
| 177 | 768.5883 | 768.5878 | 0.7   | CerP(t42:1)    | [M+Na] <sup>+</sup> |

|     |          |          |       |               |                     |
|-----|----------|----------|-------|---------------|---------------------|
| 178 | 769.4784 | 769.4780 | 0.5   | PG(O-34:3)    | [M+K] <sup>+</sup>  |
| 179 | 769.4985 | 769.4990 | 0.6   | LBPA(34:2)    | [M+Na] <sup>+</sup> |
| 180 | 769.5159 | 769.5144 | 1.9   | PA(38:1)      | [M+K] <sup>+</sup>  |
| 181 | 769.5344 | 769.5354 | 1.3   | PA(38:1(OH))  | [M+Na] <sup>+</sup> |
| 182 | 769.5625 | 769.5620 | 0.6   | SM(d36:1)     | [M+K] <sup>+</sup>  |
| 183 | 770.5103 | 770.5097 | 0.8   | PC(32:1)      | [M+K] <sup>+</sup>  |
| 184 | 770.5659 | 770.5670 | 1.4   | PE(36:0)      | [M+Na] <sup>+</sup> |
| 185 | 771.4951 | 771.4959 | 1.0   | PA(42:9)      | [M+H] <sup>+</sup>  |
| 186 | 771.5134 | 771.5147 | 1.7   | LBPA(34:1)    | [M+Na] <sup>+</sup> |
| 187 | 772.5257 | 772.5253 | 0.5   | PC(32:0)      | [M+K] <sup>+</sup>  |
| 188 | 772.5634 | 772.5617 | 2.2   | PE(O-36:0)    | [M+K] <sup>+</sup>  |
| 189 | 772.5840 | 772.5851 | 1.4   | PE(38:2)      | [M+H] <sup>+</sup>  |
| 190 | 773.5290 | 773.5303 | 1.7   | PG(34:0)      | [M+Na] <sup>+</sup> |
| 191 | 774.6010 | 774.6007 | 0.4   | PE(38:1)      | [M+H] <sup>+</sup>  |
| 192 | 775.4079 | 775.4063 | 2.1   | SQDG(28:1)    | [M+K] <sup>+</sup>  |
| 193 | 775.5271 | 775.5272 | 0.1   | PA(42:7)      | [M+H] <sup>+</sup>  |
| 194 | 775.5345 | 775.5355 | 1.3   | MGDG(36:6)    | [M+H] <sup>+</sup>  |
| 195 | 776.4113 | 776.4111 | 0.3   | PI-Cer(t30:2) | [M+K] <sup>+</sup>  |
| 196 | 776.4624 | 776.4627 | 0.4   | PE(36:5)      | [M+K] <sup>+</sup>  |
| 197 | 776.5596 | 776.5589 | 0.9   | PE(P-40:6)    | [M+H] <sup>+</sup>  |
| 198 | 776.5927 | 776.5928 | 0.1   | CerP(d44:3)   | [M+Na] <sup>+</sup> |
| 199 | 776.6179 | 776.6164 | 1.9   | PE(38:0)      | [M+H] <sup>+</sup>  |
| 200 | 777.4236 | 777.4220 | 2.1   | SQDG(28:0)    | [M+K] <sup>+</sup>  |
| 201 | 778.4272 | 778.4267 | 0.6   | PI-Cer(t30:1) | [M+K] <sup>+</sup>  |
| 202 | 778.4768 | 778.4784 | 2.1   | PE(36:4)      | [M+K] <sup>+</sup>  |
| 203 | 779.4799 | 779.4787 | 1.5   | DGDG(24:1)    | [M+H] <sup>+</sup>  |
| 204 | 780.4424 | 780.4424 | < 0.1 | PI-Cer(t30:0) | [M+K] <sup>+</sup>  |
| 205 | 780.4926 | 780.4940 | 1.8   | PE(36:3)      | [M+K] <sup>+</sup>  |
| 206 | 780.5521 | 780.5514 | 0.9   | PC(34:2)      | [M+Na] <sup>+</sup> |
| 207 | 781.4189 | 781.4191 | 0.3   | SQDG(32:7)    | [M+H] <sup>+</sup>  |
| 208 | 781.4762 | 781.4779 | 2.2   | PPA(36:2)     | [M+H] <sup>+</sup>  |
| 209 | 781.4961 | 781.4944 | 2.2   | DGDG(24:0)    | [M+H] <sup>+</sup>  |
| 210 | 781.6201 | 781.6194 | 0.9   | SM(d38:1)     | [M+Na] <sup>+</sup> |
| 211 | 782.5099 | 782.5097 | 0.3   | PE(36:2)      | [M+K] <sup>+</sup>  |
| 212 | 782.5675 | 782.5670 | 0.6   | PC(34:1)      | [M+Na] <sup>+</sup> |
| 213 | 783.4349 | 783.4348 | 0.1   | SQDG(32:6)    | [M+H] <sup>+</sup>  |
| 214 | 783.5544 | 783.5534 | 1.3   | PG(O-38:5)    | [M+H] <sup>+</sup>  |
| 215 | 784.5257 | 784.5253 | 0.5   | PE(36:1)      | [M+K] <sup>+</sup>  |
| 216 | 784.5602 | 784.5617 | 1.9   | CerP(t42:1)   | [M+K] <sup>+</sup>  |
| 217 | 784.5841 | 784.5851 | 1.3   | PC(36:3)      | [M+H] <sup>+</sup>  |
| 218 | 785.4516 | 785.4518 | 0.3   | PA(40:7)      | [M+K] <sup>+</sup>  |
| 219 | 785.5647 | 785.5667 | 2.5   | PG(O-36:1)    | [M+Na] <sup>+</sup> |
| 220 | 786.4840 | 786.4834 | 0.8   | PE(P-38:6)    | [M+K] <sup>+</sup>  |
| 221 | 786.5046 | 786.5046 | < 0.1 | PC(32:1(OH))  | [M+K] <sup>+</sup>  |
| 222 | 786.5416 | 786.5410 | 0.8   | PE(36:0)      | [M+K] <sup>+</sup>  |

|     |          |          |       |                |                     |
|-----|----------|----------|-------|----------------|---------------------|
| 223 | 786.6014 | 786.6007 | 0.9   | PC(36:2)       | [M+H] <sup>+</sup>  |
| 224 | 787.4508 | 787.4521 | 1.7   | PG(36:7)       | [M+Na] <sup>+</sup> |
| 225 | 787.4680 | 787.4675 | 0.6   | PA(40:6)       | [M+K] <sup>+</sup>  |
| 226 | 787.4875 | 787.4884 | 1.1   | PA(40:6(OH))   | [M+Na] <sup>+</sup> |
| 227 | 787.5077 | 787.5096 | 2.4   | PG(34:1(OH))   | [M+Na] <sup>+</sup> |
| 228 | 787.6688 | 787.6687 | 0.1   | SM(d40:1)      | [M+H] <sup>+</sup>  |
| 229 | 788.4978 | 788.4991 | 1.6   | PE(O-38:6)     | [M+K] <sup>+</sup>  |
| 230 | 788.5190 | 788.5201 | 1.4   | PE(38:5)       | [M+Na] <sup>+</sup> |
| 231 | 788.6165 | 788.6164 | 0.1   | PC(36:1)       | [M+H] <sup>+</sup>  |
| 232 | 789.4828 | 789.4831 | 0.4   | PA(40:5)       | [M+K] <sup>+</sup>  |
| 233 | 790.4863 | 790.4841 | 2.8   | PI-Cer(t32:1)  | [M+Na] <sup>+</sup> |
| 234 | 790.5139 | 790.5147 | 1.0   | PE(O-38:5)     | [M+K] <sup>+</sup>  |
| 235 | 790.5356 | 790.5357 | 0.1   | PE(38:4)       | [M+Na] <sup>+</sup> |
| 236 | 791.4973 | 791.4974 | 0.1   | SQDG(32:2)     | [M+H] <sup>+</sup>  |
| 237 | 792.4982 | 792.4997 | 1.9   | PI-Cer(t32:0)  | [M+Na] <sup>+</sup> |
| 238 | 792.5298 | 792.5304 | 0.8   | PE(O-38:4)     | [M+K] <sup>+</sup>  |
| 239 | 792.5540 | 792.5538 | 0.3   | PE(40:6)       | [M+H] <sup>+</sup>  |
| 240 | 792.5667 | 792.5668 | 0.1   | CerP(d44:3)    | [M+K] <sup>+</sup>  |
| 241 | 793.4187 | 793.4181 | 0.8   | PPA(34:1)      | [M+K] <sup>+</sup>  |
| 242 | 793.4762 | 793.4779 | 2.1   | PA(42:9)       | [M+Na] <sup>+</sup> |
| 243 | 793.5019 | 793.5014 | 0.6   | PG(38:7)       | [M+H] <sup>+</sup>  |
| 244 | 793.5144 | 793.5144 | < 0.1 | PA(40:3)       | [M+K] <sup>+</sup>  |
| 245 | 793.5575 | 793.5589 | 1.8   | PG(36:1(OH))   | [M+H] <sup>+</sup>  |
| 246 | 794.5078 | 794.5083 | 0.6   | SHexCer(t34:2) | [M+H] <sup>+</sup>  |
| 247 | 794.5174 | 794.5178 | 0.5   | PI-Cer(t34:2)  | [M+H] <sup>+</sup>  |
| 248 | 794.5458 | 794.5460 | 0.3   | PE(O-38:3)     | [M+K] <sup>+</sup>  |
| 249 | 794.5835 | 794.5824 | 1.4   | CerP(d44:2)    | [M+K] <sup>+</sup>  |
| 250 | 794.6106 | 794.6116 | 1.3   | HexCer(t38:1)  | [M+Na] <sup>+</sup> |
| 251 | 795.4943 | 795.4937 | 0.8   | PG(O-36:4)     | [M+K] <sup>+</sup>  |
| 252 | 795.5305 | 795.5301 | 0.5   | PA(40:2)       | [M+K] <sup>+</sup>  |
| 253 | 795.5497 | 795.5510 | 1.6   | PA(40:2(OH))   | [M+Na] <sup>+</sup> |
| 254 | 796.5255 | 796.5253 | 0.3   | PC(34:2)       | [M+K] <sup>+</sup>  |
| 255 | 796.5617 | 796.5617 | < 0.1 | PE(O-38:2)     | [M+K] <sup>+</sup>  |
| 256 | 796.5846 | 796.5851 | 0.6   | PE(40:4)       | [M+H] <sup>+</sup>  |
| 257 | 797.5099 | 797.5093 | 0.8   | PG(O-36:3)     | [M+K] <sup>+</sup>  |
| 258 | 797.5291 | 797.5303 | 1.5   | LBPA(36:2)     | [M+Na] <sup>+</sup> |
| 259 | 797.5655 | 797.5667 | 1.5   | PA(40:1(OH))   | [M+Na] <sup>+</sup> |
| 260 | 797.5932 | 797.5933 | 0.1   | SM(d38:1)      | [M+K] <sup>+</sup>  |
| 261 | 798.5410 | 798.5410 | < 0.1 | PC(34:1)       | [M+K] <sup>+</sup>  |
| 262 | 798.5965 | 798.5983 | 2.3   | PE(38:0)       | [M+Na] <sup>+</sup> |
| 263 | 799.4085 | 799.4063 | 2.8   | SQDG(30:3)     | [M+K] <sup>+</sup>  |
| 264 | 799.5444 | 799.5460 | 2.0   | PG(36:1)       | [M+Na] <sup>+</sup> |
| 265 | 800.4617 | 800.4627 | 1.2   | PE(38:7)       | [M+K] <sup>+</sup>  |
| 266 | 800.5576 | 800.5566 | 1.2   | PC(34:0)       | [M+K] <sup>+</sup>  |
| 267 | 800.6162 | 800.6164 | 0.2   | PE(40:2)       | [M+H] <sup>+</sup>  |



|     |          |          |       |               |                     |
|-----|----------|----------|-------|---------------|---------------------|
| 268 | 801.4236 | 801.4220 | 2.0   | SQDG(30:2)    | [M+K] <sup>+</sup>  |
| 269 | 801.5432 | 801.5430 | 0.2   | TG(46:8)      | [M+K] <sup>+</sup>  |
| 270 | 801.5606 | 801.5616 | 1.2   | PG(36:0)      | [M+Na] <sup>+</sup> |
| 271 | 802.4784 | 802.4784 | < 0.1 | PE(38:6)      | [M+K] <sup>+</sup>  |
| 272 | 802.6321 | 802.6320 | 0.1   | PE(40:1)      | [M+H] <sup>+</sup>  |
| 273 | 803.4385 | 803.4376 | 1.1   | SQDG(30:1)    | [M+K] <sup>+</sup>  |
| 274 | 803.4593 | 803.4599 | 0.7   | PPA(36:2)     | [M+Na] <sup>+</sup> |
| 275 | 803.4818 | 803.4835 | 2.1   | PG(34:1(OH))  | [M+K] <sup>+</sup>  |
| 276 | 803.5594 | 803.5586 | 1.0   | TG(46:7)      | [M+K] <sup>+</sup>  |
| 277 | 803.5658 | 803.5668 | 1.2   | MGDG(38:6)    | [M+H] <sup>+</sup>  |
| 278 | 804.4417 | 804.4424 | 0.9   | PI-Cer(t32:2) | [M+K] <sup>+</sup>  |
| 279 | 804.4923 | 804.4940 | 2.1   | PE(38:5)      | [M+K] <sup>+</sup>  |
| 280 | 804.5512 | 804.5514 | 0.2   | PC(36:4)      | [M+Na] <sup>+</sup> |
| 281 | 804.6111 | 804.6113 | 0.2   | PC(36:1(OH))  | [M+H] <sup>+</sup>  |
| 282 | 805.4547 | 805.4533 | 1.7   | SQDG(30:0)    | [M+K] <sup>+</sup>  |
| 283 | 805.4957 | 805.4944 | 1.6   | DGDG(26:2)    | [M+H] <sup>+</sup>  |
| 284 | 806.4573 | 806.4580 | 0.9   | PI-Cer(t32:1) | [M+K] <sup>+</sup>  |
| 285 | 806.5089 | 806.5097 | 1.0   | PE(38:4)      | [M+K] <sup>+</sup>  |
| 286 | 806.5697 | 806.5694 | 0.4   | PC(38:6)      | [M+H] <sup>+</sup>  |
| 287 | 806.6474 | 806.6480 | 0.7   | HexCer(d40:1) | [M+Na] <sup>+</sup> |
| 288 | 807.4343 | 807.4348 | 0.6   | SQDG(34:8)    | [M+H] <sup>+</sup>  |
| 289 | 807.5122 | 807.5100 | 2.7   | DGDG(26:1)    | [M+H] <sup>+</sup>  |
| 290 | 808.4730 | 808.4737 | 0.9   | PI-Cer(t32:0) | [M+K] <sup>+</sup>  |
| 291 | 808.4869 | 808.4888 | 2.4   | PE(40:9)      | [M+Na] <sup>+</sup> |
| 292 | 808.5677 | 808.5698 | 2.6   | PI-Cer(d36:1) | [M+H] <sup>+</sup>  |
| 293 | 808.5839 | 808.5851 | 1.5   | PC(38:5)      | [M+H] <sup>+</sup>  |
| 294 | 809.4498 | 809.4504 | 0.7   | SQDG(34:7)    | [M+H] <sup>+</sup>  |
| 295 | 809.5713 | 809.5691 | 2.7   | PG(O-40:6)    | [M+H] <sup>+</sup>  |
| 296 | 809.6506 | 809.6507 | 0.1   | SM(d40:1)     | [M+Na] <sup>+</sup> |
| 297 | 810.4334 | 810.4318 | 2.0   | PS(34:4(OH))  | [M+K] <sup>+</sup>  |
| 298 | 810.5409 | 810.5410 | 0.1   | PE(38:2)      | [M+K] <sup>+</sup>  |
| 299 | 810.5990 | 810.5983 | 0.9   | PC(36:1)      | [M+Na] <sup>+</sup> |
| 300 | 810.6813 | 810.6817 | 0.5   | HexCer(d42:2) | [M+H] <sup>+</sup>  |
| 301 | 811.4507 | 811.4521 | 1.7   | PG(38:9)      | [M+Na] <sup>+</sup> |
| 302 | 811.4677 | 811.4675 | 0.2   | PA(42:8)      | [M+K] <sup>+</sup>  |
| 303 | 811.5850 | 811.5847 | 0.4   | PG(O-40:5)    | [M+H] <sup>+</sup>  |
| 304 | 812.4981 | 812.4991 | 1.2   | PE(P-40:7)    | [M+K] <sup>+</sup>  |
| 305 | 812.5195 | 812.5201 | 0.7   | PE(40:7)      | [M+Na] <sup>+</sup> |
| 306 | 812.5399 | 812.5412 | 1.6   | PS(36:1)      | [M+Na] <sup>+</sup> |
| 307 | 812.5568 | 812.5566 | 0.2   | PE(38:1)      | [M+K] <sup>+</sup>  |
| 308 | 812.5908 | 812.5930 | 2.7   | CerP(t44:1)   | [M+K] <sup>+</sup>  |
| 309 | 813.4834 | 813.4831 | 0.4   | PA(42:7)      | [M+K] <sup>+</sup>  |
| 310 | 813.5017 | 813.5041 | 3.0   | PA(42:7(OH))  | [M+Na] <sup>+</sup> |
| 311 | 813.5229 | 813.5252 | 2.8   | PG(36:2(OH))  | [M+Na] <sup>+</sup> |
| 312 | 813.6841 | 813.6844 | 0.4   | SM(d42:2)     | [M+H] <sup>+</sup>  |

|     |          |          |       |                |                     |
|-----|----------|----------|-------|----------------|---------------------|
| 313 | 814.5151 | 814.5147 | 0.5   | PE(P-40:6)     | [M+K] <sup>+</sup>  |
| 314 | 814.5358 | 814.5359 | 0.1   | PC(34:1(OH))   | [M+K] <sup>+</sup>  |
| 315 | 814.5556 | 814.5569 | 1.6   | PS(36:0)       | [M+Na] <sup>+</sup> |
| 316 | 814.6318 | 814.6320 | 0.2   | PC(38:2)       | [M+H] <sup>+</sup>  |
| 317 | 815.5186 | 815.5197 | 1.3   | PA(42:6(OH))   | [M+Na] <sup>+</sup> |
| 318 | 815.5393 | 815.5409 | 2.0   | PG(36:1(OH))   | [M+Na] <sup>+</sup> |
| 319 | 815.6998 | 815.7000 | 0.2   | SM(d42:1)      | [M+H] <sup>+</sup>  |
| 320 | 816.4941 | 816.4940 | 0.1   | PC(36:6)       | [M+K] <sup>+</sup>  |
| 321 | 816.5290 | 816.5304 | 1.7   | PE(O-40:6)     | [M+K] <sup>+</sup>  |
| 322 | 816.6476 | 816.6477 | 0.1   | PC(38:1)       | [M+H] <sup>+</sup>  |
| 323 | 817.5142 | 817.5144 | 0.2   | PA(42:5)       | [M+K] <sup>+</sup>  |
| 324 | 818.5101 | 818.5097 | 0.5   | PC(36:5)       | [M+K] <sup>+</sup>  |
| 325 | 818.5448 | 818.5460 | 1.5   | PE(O-40:5)     | [M+K] <sup>+</sup>  |
| 326 | 820.5255 | 820.5253 | 0.2   | PC(36:4)       | [M+K] <sup>+</sup>  |
| 327 | 820.5853 | 820.5851 | 0.2   | PE(42:6)       | [M+H] <sup>+</sup>  |
| 328 | 820.6057 | 820.6062 | 0.6   | PS(38:0)       | [M+H] <sup>+</sup>  |
| 329 | 821.5289 | 821.5303 | 1.7   | PG(38:4)       | [M+Na] <sup>+</sup> |
| 330 | 821.5888 | 821.5902 | 1.7   | PG(38:1(OH))   | [M+H] <sup>+</sup>  |
| 331 | 822.5410 | 822.5410 | < 0.1 | PC(36:3)       | [M+K] <sup>+</sup>  |
| 332 | 822.6215 | 822.6219 | 0.5   | PS(O-38:0(OH)) | [M+H] <sup>+</sup>  |
| 333 | 822.6425 | 822.6429 | 0.5   | HexCer(t40:1)  | [M+Na] <sup>+</sup> |
| 334 | 823.4081 | 823.4063 | 2.2   | SQDG(32:5)     | [M+K] <sup>+</sup>  |
| 335 | 823.5272 | 823.5272 | < 0.1 | PA(46:11)      | [M+H] <sup>+</sup>  |
| 336 | 823.5448 | 823.5460 | 1.5   | PG(38:3)       | [M+Na] <sup>+</sup> |
| 337 | 823.5622 | 823.5614 | 1.0   | PA(42:2)       | [M+K] <sup>+</sup>  |
| 338 | 823.6080 | 823.6090 | 1.2   | SM(d40:2)      | [M+K] <sup>+</sup>  |
| 339 | 824.4608 | 824.4627 | 2.3   | PE(40:9)       | [M+K] <sup>+</sup>  |
| 340 | 824.5566 | 824.5566 | < 0.1 | PC(36:2)       | [M+K] <sup>+</sup>  |
| 341 | 824.6159 | 824.6164 | 0.6   | PE(42:4)       | [M+H] <sup>+</sup>  |
| 342 | 824.6363 | 824.6376 | 1.6   | HexCer(d40:0)  | [M+K] <sup>+</sup>  |
| 343 | 824.6570 | 824.6586 | 1.9   | HexCer(t40:0)  | [M+Na] <sup>+</sup> |
| 344 | 825.4238 | 825.4220 | 2.2   | SQDG(32:4)     | [M+K] <sup>+</sup>  |
| 345 | 825.4640 | 825.4631 | 1.1   | DGDG(28:6)     | [M+H] <sup>+</sup>  |
| 346 | 825.5599 | 825.5616 | 2.1   | PG(38:2)       | [M+Na] <sup>+</sup> |
| 347 | 825.6237 | 825.6246 | 1.1   | SM(d40:1)      | [M+K] <sup>+</sup>  |
| 348 | 826.4766 | 826.4784 | 2.2   | PE(40:8)       | [M+K] <sup>+</sup>  |
| 349 | 826.4995 | 826.4995 | < 0.1 | PS(36:2)       | [M+K] <sup>+</sup>  |
| 350 | 826.5721 | 826.5721 | < 0.1 | PE(P-42:6)     | [M+Na] <sup>+</sup> |
| 351 | 827.4396 | 827.4376 | 2.4   | SQDG(32:3)     | [M+K] <sup>+</sup>  |
| 352 | 827.4800 | 827.4787 | 1.6   | DGDG(28:5)     | [M+H] <sup>+</sup>  |
| 353 | 827.5755 | 827.5773 | 2.2   | PG(38:1)       | [M+Na] <sup>+</sup> |
| 354 | 827.6401 | 827.6403 | 0.2   | SM(d40:0)      | [M+K] <sup>+</sup>  |
| 355 | 828.4925 | 828.4940 | 1.8   | PE(40:7)       | [M+K] <sup>+</sup>  |
| 356 | 828.5145 | 828.5150 | 0.6   | PE(40:7(OH))   | [M+Na] <sup>+</sup> |
| 357 | 828.5520 | 828.5515 | 0.6   | PE(38:1(OH))   | [M+K] <sup>+</sup>  |

|     |          |          |       |                |                     |
|-----|----------|----------|-------|----------------|---------------------|
| 358 | 828.6453 | 828.6453 | < 0.1 | PE(O-40:0(OH)) | [M+Na] <sup>+</sup> |
| 359 | 829.4547 | 829.4533 | 1.7   | SQDG(32:2)     | [M+K] <sup>+</sup>  |
| 360 | 829.4960 | 829.4944 | 1.9   | DGDG(28:4)     | [M+H] <sup>+</sup>  |
| 361 | 829.5750 | 829.5743 | 0.8   | TG(48:8)       | [M+K] <sup>+</sup>  |
| 362 | 830.5099 | 830.5097 | 0.2   | PE(40:6)       | [M+K] <sup>+</sup>  |
| 363 | 830.5286 | 830.5306 | 2.4   | PE(40:6(OH))   | [M+Na] <sup>+</sup> |
| 364 | 830.5578 | 830.5600 | 2.6   | LacCer(d30:0)  | [M+Na] <sup>+</sup> |
| 365 | 830.5672 | 830.5672 | < 0.1 | PE(38:0(OH))   | [M+K] <sup>+</sup>  |
| 366 | 830.6266 | 830.6269 | 0.4   | PC(38:2(OH))   | [M+H] <sup>+</sup>  |
| 367 | 830.6634 | 830.6633 | 0.1   | PE(42:1)       | [M+H] <sup>+</sup>  |
| 368 | 831.4342 | 831.4348 | 0.7   | SQDG(36:10)    | [M+H] <sup>+</sup>  |
| 369 | 831.4695 | 831.4689 | 0.7   | SQDG(32:1)     | [M+K] <sup>+</sup>  |
| 370 | 831.4918 | 831.4937 | 2.3   | PA(42:6(OH))   | [M+K] <sup>+</sup>  |
| 371 | 831.5132 | 831.5148 | 1.9   | PG(36:1(OH))   | [M+K] <sup>+</sup>  |
| 372 | 832.4718 | 832.4737 | 2.3   | PI-Cer(t34:2)  | [M+K] <sup>+</sup>  |
| 373 | 832.5101 | 832.5099 | 0.2   | PS(38:5)       | [M+Na] <sup>+</sup> |
| 374 | 832.5833 | 832.5827 | 0.7   | PC(38:4)       | [M+Na] <sup>+</sup> |
| 375 | 832.6430 | 832.6426 | 0.5   | PC(38:1(OH))   | [M+H] <sup>+</sup>  |
| 376 | 832.6628 | 832.6637 | 1.1   | HexCer(d42:2)  | [M+Na] <sup>+</sup> |
| 377 | 833.4502 | 833.4504 | 0.2   | SQDG(36:9)     | [M+H] <sup>+</sup>  |
| 378 | 833.4855 | 833.4846 | 1.1   | SQDG(32:0)     | [M+K] <sup>+</sup>  |
| 379 | 833.5259 | 833.5257 | 0.2   | DGDG(28:2)     | [M+H] <sup>+</sup>  |
| 380 | 833.6485 | 833.6507 | 2.6   | SM(d42:3)      | [M+Na] <sup>+</sup> |
| 381 | 834.5400 | 834.5410 | 1.2   | PE(40:4)       | [M+K] <sup>+</sup>  |
| 382 | 834.6012 | 834.6007 | 0.6   | PC(40:6)       | [M+H] <sup>+</sup>  |
| 383 | 834.6788 | 834.6793 | 0.6   | HexCer(d42:1)  | [M+Na] <sup>+</sup> |
| 384 | 835.4658 | 835.4661 | 0.4   | SQDG(36:8)     | [M+H] <sup>+</sup>  |
| 385 | 835.5434 | 835.5413 | 2.5   | DGDG(28:1)     | [M+H] <sup>+</sup>  |
| 386 | 835.6656 | 835.6663 | 0.8   | SM(d42:2)      | [M+Na] <sup>+</sup> |
| 387 | 836.4970 | 836.4955 | 1.8   | SHexCer(t34:0) | [M+K] <sup>+</sup>  |
| 388 | 836.5180 | 836.5201 | 2.5   | PE(42:9)       | [M+Na] <sup>+</sup> |
| 389 | 836.5996 | 836.6011 | 1.8   | PI-Cer(d38:1)  | [M+H] <sup>+</sup>  |
| 390 | 836.6125 | 836.6140 | 1.8   | PC(38:2)       | [M+Na] <sup>+</sup> |
| 391 | 836.6370 | 836.6375 | 0.6   | DGTA(40:5)     | [M+Na] <sup>+</sup> |
| 392 | 837.6407 | 837.6426 | 2.3   | MGDG(38:0)     | [M+Na] <sup>+</sup> |
| 393 | 837.6825 | 837.6820 | 0.6   | SM(d42:1)      | [M+Na] <sup>+</sup> |
| 394 | 838.4398 | 838.4420 | 2.6   | PE(40:10(OH))  | [M+K] <sup>+</sup>  |
| 395 | 838.5727 | 838.5723 | 0.5   | PE(40:2)       | [M+K] <sup>+</sup>  |
| 396 | 838.6157 | 838.6168 | 1.3   | PI-Cer(d38:0)  | [M+H] <sup>+</sup>  |
| 397 | 838.6304 | 838.6296 | 1.0   | PC(38:1)       | [M+Na] <sup>+</sup> |
| 398 | 839.4988 | 839.4988 | < 0.1 | PA(44:8)       | [M+K] <sup>+</sup>  |
| 399 | 840.5511 | 840.5514 | 0.4   | PE(42:7)       | [M+Na] <sup>+</sup> |
| 400 | 840.5878 | 840.5878 | < 0.1 | PC(P-40:6)     | [M+Na] <sup>+</sup> |
| 401 | 840.6227 | 840.6243 | 1.9   | CerP(t46:1)    | [M+K] <sup>+</sup>  |
| 402 | 840.6328 | 840.6325 | 0.4   | HexCer(t40:0)  | [M+K] <sup>+</sup>  |

|     |          |          |       |                |                     |
|-----|----------|----------|-------|----------------|---------------------|
| 403 | 841.5544 | 841.5565 | 2.5   | PG(38:2(OH))   | [M+Na] <sup>+</sup> |
| 404 | 841.6177 | 841.6195 | 2.1   | SM(t40:1)      | [M+K] <sup>+</sup>  |
| 405 | 842.5100 | 842.5097 | 0.4   | PC(38:7)       | [M+K] <sup>+</sup>  |
| 406 | 842.5669 | 842.5670 | 0.1   | PE(42:6)       | [M+Na] <sup>+</sup> |
| 407 | 842.6381 | 842.6399 | 2.1   | CerP(t46:0)    | [M+K] <sup>+</sup>  |
| 408 | 842.6623 | 842.6633 | 1.2   | PC(40:2)       | [M+H] <sup>+</sup>  |
| 409 | 843.5134 | 843.5147 | 1.5   | PG(40:7)       | [M+Na] <sup>+</sup> |
| 410 | 843.5702 | 843.5722 | 2.4   | PG(38:1(OH))   | [M+Na] <sup>+</sup> |
| 411 | 843.6352 | 843.6352 | < 0.1 | SM(t40:0)      | [M+K] <sup>+</sup>  |
| 412 | 844.5076 | 844.5101 | 3.0   | PI-Cer(d36:2)  | [M+K] <sup>+</sup>  |
| 413 | 844.5253 | 844.5253 | < 0.1 | PC(38:6)       | [M+K] <sup>+</sup>  |
| 414 | 844.6783 | 844.6790 | 0.8   | PC(40:1)       | [M+H] <sup>+</sup>  |
| 415 | 845.5287 | 845.5303 | 1.9   | PG(40:6)       | [M+Na] <sup>+</sup> |
| 416 | 846.4659 | 846.4682 | 2.7   | PS(38:6)       | [M+K] <sup>+</sup>  |
| 417 | 846.5255 | 846.5257 | 0.2   | PI-Cer(d36:1)  | [M+K] <sup>+</sup>  |
| 418 | 846.5409 | 846.5410 | 0.1   | PC(38:5)       | [M+K] <sup>+</sup>  |
| 419 | 846.6008 | 846.6007 | 0.1   | PE(44:7)       | [M+H] <sup>+</sup>  |
| 420 | 846.6213 | 846.6219 | 0.7   | PS(40:1)       | [M+H] <sup>+</sup>  |
| 421 | 847.4061 | 847.4063 | 0.2   | SQDG(34:7)     | [M+K] <sup>+</sup>  |
| 422 | 847.5456 | 847.5460 | 0.5   | PG(40:5)       | [M+Na] <sup>+</sup> |
| 423 | 847.6639 | 847.6663 | 2.8   | PE-Cer(d46:3)  | [M+Na] <sup>+</sup> |
| 424 | 848.4815 | 848.4837 | 2.6   | PE(42:11(OH))  | [M+Na] <sup>+</sup> |
| 425 | 848.5567 | 848.5566 | 0.1   | PC(38:4)       | [M+K] <sup>+</sup>  |
| 426 | 848.6163 | 848.6164 | 0.1   | PE(44:6)       | [M+H] <sup>+</sup>  |
| 427 | 848.6370 | 848.6375 | 0.6   | PS(40:0)       | [M+H] <sup>+</sup>  |
| 428 | 848.6576 | 848.6586 | 1.2   | HexCer(t42:2)  | [M+Na] <sup>+</sup> |
| 429 | 849.4240 | 849.4220 | 2.4   | SQDG(34:6)     | [M+K] <sup>+</sup>  |
| 430 | 849.5600 | 849.5616 | 1.9   | PG(40:4)       | [M+Na] <sup>+</sup> |
| 431 | 849.6214 | 849.6215 | 0.1   | PG(40:1(OH))   | [M+H] <sup>+</sup>  |
| 432 | 850.4764 | 850.4784 | 2.4   | PE(42:10)      | [M+K] <sup>+</sup>  |
| 433 | 850.5710 | 850.5709 | 0.1   | SHexCer(t38:2) | [M+H] <sup>+</sup>  |
| 434 | 850.6520 | 850.6532 | 1.4   | PS(O-40:0(OH)) | [M+H] <sup>+</sup>  |
| 435 | 850.6736 | 850.6742 | 0.7   | HexCer(t42:1)  | [M+Na] <sup>+</sup> |
| 436 | 851.4392 | 851.4376 | 1.9   | SQDG(34:5)     | [M+K] <sup>+</sup>  |
| 437 | 851.4800 | 851.4810 | 1.2   | PGP(34:1)      | [M+Na] <sup>+</sup> |
| 438 | 851.5587 | 851.5585 | 0.2   | PA(48:11)      | [M+H] <sup>+</sup>  |
| 439 | 851.5758 | 851.5773 | 1.8   | PG(40:3)       | [M+Na] <sup>+</sup> |
| 440 | 851.6392 | 851.6403 | 1.3   | SM(d42:2)      | [M+K] <sup>+</sup>  |
| 441 | 852.4918 | 852.4940 | 2.6   | PE(42:9)       | [M+K] <sup>+</sup>  |
| 442 | 852.5130 | 852.5150 | 2.3   | PE(42:9(OH))   | [M+Na] <sup>+</sup> |
| 443 | 852.5876 | 852.5879 | 0.4   | PC(38:2)       | [M+K] <sup>+</sup>  |
| 444 | 852.6448 | 852.6453 | 0.6   | PE(42:1)       | [M+Na] <sup>+</sup> |
| 445 | 852.6825 | 852.6817 | 0.9   | CerP(t48:1)    | [M+Na] <sup>+</sup> |
| 446 | 853.4185 | 853.4167 | 2.1   | SQDG(36:10)    | [M+Na] <sup>+</sup> |
| 447 | 853.4952 | 853.4944 | 0.9   | DGDG(30:6)     | [M+H] <sup>+</sup>  |

|     |          |          |       |               |                     |
|-----|----------|----------|-------|---------------|---------------------|
| 448 | 853.5909 | 853.5929 | 2.3   | PG(40:2)      | [M+Na] <sup>+</sup> |
| 449 | 853.6558 | 853.6559 | 0.1   | SM(d42:1)     | [M+K] <sup>+</sup>  |
| 450 | 854.4977 | 854.4967 | 1.2   | PS(42:11)     | [M+H] <sup>+</sup>  |
| 451 | 854.5303 | 854.5306 | 0.4   | PE(42:8(OH))  | [M+Na] <sup>+</sup> |
| 452 | 854.5675 | 854.5672 | 0.4   | PE(40:2(OH))  | [M+K] <sup>+</sup>  |
| 453 | 854.6035 | 854.6036 | 0.1   | PC(38:1)      | [M+K] <sup>+</sup>  |
| 454 | 854.6389 | 854.6399 | 1.2   | PE(O-42:1)    | [M+K] <sup>+</sup>  |
| 455 | 854.6594 | 854.6609 | 1.8   | PE(42:0)      | [M+Na] <sup>+</sup> |
| 456 | 855.4913 | 855.4937 | 2.8   | PA(44:8(OH))  | [M+K] <sup>+</sup>  |
| 457 | 855.6067 | 855.6086 | 2.2   | PG(40:1)      | [M+Na] <sup>+</sup> |
| 458 | 856.5241 | 856.5253 | 1.4   | PE(42:7)      | [M+K] <sup>+</sup>  |
| 459 | 856.5457 | 856.5463 | 0.7   | PE(42:7(OH))  | [M+Na] <sup>+</sup> |
| 460 | 856.5828 | 856.5828 | < 0.1 | PE(40:1(OH))  | [M+K] <sup>+</sup>  |
| 461 | 857.4505 | 857.4480 | 2.9   | SQDG(36:8)    | [M+Na] <sup>+</sup> |
| 462 | 858.5044 | 858.5044 | < 0.1 | PE(44:12)     | [M+Na] <sup>+</sup> |
| 463 | 858.5248 | 858.5256 | 0.9   | PS(40:6)      | [M+Na] <sup>+</sup> |
| 464 | 858.5416 | 858.5410 | 0.7   | PE(42:6)      | [M+K] <sup>+</sup>  |
| 465 | 858.5609 | 858.5619 | 1.2   | PE(42:6(OH))  | [M+Na] <sup>+</sup> |
| 466 | 858.5891 | 858.5913 | 2.6   | LacCer(d32:0) | [M+Na] <sup>+</sup> |
| 467 | 859.5450 | 859.5461 | 1.3   | PG(38:1(OH))  | [M+K] <sup>+</sup>  |
| 468 | 860.5198 | 860.5201 | 0.3   | PE(44:11)     | [M+Na] <sup>+</sup> |
| 469 | 860.6148 | 860.6140 | 0.9   | PC(40:4)      | [M+Na] <sup>+</sup> |
| 470 | 861.5175 | 861.5159 | 1.9   | SQDG(34:0)    | [M+K] <sup>+</sup>  |
| 471 | 862.5338 | 862.5357 | 2.2   | PE(44:10)     | [M+Na] <sup>+</sup> |
| 472 | 862.6160 | 862.6168 | 0.9   | PI-Cer(d40:2) | [M+H] <sup>+</sup>  |
| 473 | 864.4552 | 864.4576 | 2.8   | PE(42:11(OH)) | [M+K] <sup>+</sup>  |
| 474 | 864.6315 | 864.6324 | 1.0   | PI-Cer(d40:1) | [M+H] <sup>+</sup>  |
| 475 | 866.6474 | 866.6481 | 0.8   | PI-Cer(d40:0) | [M+H] <sup>+</sup>  |
| 476 | 867.4537 | 867.4549 | 1.4   | PGP(34:1)     | [M+K] <sup>+</sup>  |
| 477 | 867.6585 | 867.6603 | 2.1   | PA(O-46:1)    | [M+K] <sup>+</sup>  |
| 478 | 868.5253 | 868.5253 | < 0.1 | PC(40:8)      | [M+K] <sup>+</sup>  |
| 479 | 868.6190 | 868.6191 | 0.1   | PC(P-42:6)    | [M+Na] <sup>+</sup> |
| 480 | 868.6531 | 868.6556 | 2.9   | CerP(t48:1)   | [M+K] <sup>+</sup>  |
| 481 | 868.6623 | 868.6638 | 1.7   | HexCer(t42:0) | [M+K] <sup>+</sup>  |
| 482 | 869.6496 | 869.6508 | 1.4   | SM(t42:1)     | [M+K] <sup>+</sup>  |
| 483 | 870.4661 | 870.4682 | 2.4   | PS(40:8)      | [M+K] <sup>+</sup>  |
| 484 | 870.5409 | 870.5410 | 0.1   | PC(40:7)      | [M+K] <sup>+</sup>  |
| 485 | 870.6938 | 870.6946 | 0.9   | PC(42:2)      | [M+H] <sup>+</sup>  |
| 486 | 871.5443 | 871.5460 | 2.0   | PG(42:7)      | [M+Na] <sup>+</sup> |
| 487 | 872.5566 | 872.5566 | < 0.1 | PC(40:6)      | [M+K] <sup>+</sup>  |
| 488 | 873.4235 | 873.4220 | 1.7   | SQDG(36:8)    | [M+K] <sup>+</sup>  |
| 489 | 873.5600 | 873.5616 | 1.8   | PG(42:6)      | [M+Na] <sup>+</sup> |
| 490 | 874.4775 | 874.4784 | 1.0   | PE(44:12)     | [M+K] <sup>+</sup>  |
| 491 | 874.4993 | 874.4993 | < 0.1 | PE(44:12(OH)) | [M+Na] <sup>+</sup> |
| 492 | 874.5550 | 874.5570 | 2.3   | PI-Cer(d38:1) | [M+K] <sup>+</sup>  |



|     |          |          |       |                |                     |
|-----|----------|----------|-------|----------------|---------------------|
| 493 | 875.5028 | 875.5045 | 1.9   | LPIP(32:1)     | [M+H] <sup>+</sup>  |
| 494 | 876.5129 | 876.5150 | 2.4   | PE(44:11(OH))  | [M+Na] <sup>+</sup> |
| 495 | 876.5636 | 876.5631 | 0.6   | SHexCer(d38:0) | [M+K] <sup>+</sup>  |
| 496 | 876.5878 | 876.5879 | 0.1   | PC(40:4)       | [M+K] <sup>+</sup>  |
| 497 | 877.5912 | 877.5929 | 1.9   | PG(42:4)       | [M+Na] <sup>+</sup> |
| 498 | 878.5073 | 878.5097 | 2.7   | PE(44:10)      | [M+K] <sup>+</sup>  |
| 499 | 878.5280 | 878.5306 | 3.0   | PE(44:10(OH))  | [M+Na] <sup>+</sup> |
| 500 | 879.5107 | 879.5100 | 0.8   | DGDG(32:7)     | [M+H] <sup>+</sup>  |
| 501 | 880.5233 | 880.5253 | 2.3   | PE(44:9)       | [M+K] <sup>+</sup>  |
| 502 | 880.5449 | 880.5463 | 1.6   | PE(44:9(OH))   | [M+Na] <sup>+</sup> |
| 503 | 880.6184 | 880.6178 | 0.7   | SHexCer(t40:1) | [M+H] <sup>+</sup>  |
| 504 | 881.6219 | 881.6242 | 2.6   | PG(42:2)       | [M+Na] <sup>+</sup> |
| 505 | 882.6344 | 882.6347 | 0.3   | PE(P-46:6)     | [M+Na] <sup>+</sup> |
| 506 | 883.6376 | 883.6399 | 2.6   | PG(42:1)       | [M+Na] <sup>+</sup> |
| 507 | 888.5509 | 888.5514 | 0.6   | PE(46:11)      | [M+Na] <sup>+</sup> |
| 508 | 892.5255 | 892.5253 | 0.2   | PC(42:10)      | [M+K] <sup>+</sup>  |
| 509 | 892.6612 | 892.6637 | 2.8   | PI-Cer(d42:1)  | [M+H] <sup>+</sup>  |
| 510 | 895.6905 | 895.6916 | 1.2   | PA(O-48:1)     | [M+K] <sup>+</sup>  |
| 511 | 896.6498 | 896.6504 | 0.7   | PC(P-44:6)     | [M+Na] <sup>+</sup> |
| 512 | 897.4846 | 897.4865 | 2.1   | LPIP(32:1)     | [M+Na] <sup>+</sup> |
| 513 | 898.4893 | 898.4900 | 0.8   | MIPC(t28:0)    | [M+Na] <sup>+</sup> |
| 514 | 898.5723 | 898.5723 | < 0.1 | PC(42:7)       | [M+K] <sup>+</sup>  |
| 515 | 899.5759 | 899.5773 | 1.6   | PG(44:7)       | [M+Na] <sup>+</sup> |
| 516 | 904.5228 | 904.5253 | 2.8   | PE(46:11)      | [M+K] <sup>+</sup>  |
| 517 | 904.5456 | 904.5463 | 0.8   | PE(46:11(OH))  | [M+Na] <sup>+</sup> |
| 518 | 905.4944 | 905.4941 | 0.3   | PI(P-38:6)     | [M+K] <sup>+</sup>  |
| 519 | 907.5414 | 907.5413 | 0.1   | DGDG(34:7)     | [M+H] <sup>+</sup>  |
| 520 | 908.6496 | 908.6491 | 0.6   | SHexCer(t42:1) | [M+H] <sup>+</sup>  |
| 521 | 909.5461 | 909.5463 | 0.2   | Glc-GP(38:4)   | [M+Na] <sup>+</sup> |
| 522 | 909.6529 | 909.6555 | 2.9   | PG(44:2)       | [M+Na] <sup>+</sup> |
| 523 | 909.6696 | 909.6709 | 1.4   | PA(48:1)       | [M+K] <sup>+</sup>  |
| 524 | 910.6657 | 910.6660 | 0.3   | PE(P-48:6)     | [M+Na] <sup>+</sup> |
| 525 | 911.6688 | 911.6712 | 2.6   | PG(44:1)       | [M+Na] <sup>+</sup> |
| 526 | 913.4586 | 913.4604 | 2.0   | LPIP(32:1)     | [M+K] <sup>+</sup>  |
| 527 | 915.5989 | 915.6015 | 2.8   | DGDG(32:0)     | [M+Na] <sup>+</sup> |
| 528 | 916.5252 | 916.5253 | 0.1   | PC(44:12)      | [M+K] <sup>+</sup>  |
| 529 | 917.4674 | 917.4659 | 1.6   | DGDG(32:7)     | [M+K] <sup>+</sup>  |
| 530 | 919.4706 | 919.4708 | 0.2   | LPIP(34:4)     | [M+Na] <sup>+</sup> |
| 531 | 919.6894 | 919.6916 | 2.4   | PA(O-50:3)     | [M+K] <sup>+</sup>  |
| 532 | 920.5180 | 920.5202 | 2.4   | PE(46:11(OH))  | [M+K] <sup>+</sup>  |
| 533 | 920.6930 | 920.6950 | 2.2   | PI-Cer(d44:1)  | [M+H] <sup>+</sup>  |
| 534 | 921.5143 | 921.5124 | 2.1   | PI(40:9(OH))   | [M+H] <sup>+</sup>  |
| 535 | 923.5043 | 923.5045 | 0.2   | PIP(O-36:5)    | [M+H] <sup>+</sup>  |
| 536 | 925.5199 | 925.5202 | 0.3   | CL(36:4)       | [M+H] <sup>+</sup>  |
| 537 | 926.5237 | 926.5213 | 2.6   | MIPC(t30:0)    | [M+Na] <sup>+</sup> |

|     |          |          |       |                |                     |
|-----|----------|----------|-------|----------------|---------------------|
| 538 | 931.5286 | 931.5307 | 2.3   | PI(40:7)       | [M+Na] <sup>+</sup> |
| 539 | 935.4442 | 935.4448 | 0.6   | LPIP(34:4)     | [M+K] <sup>+</sup>  |
| 540 | 935.4967 | 935.4950 | 1.8   | SQDG(42:11)    | [M+Na] <sup>+</sup> |
| 541 | 936.6810 | 936.6804 | 0.6   | SHexCer(t44:1) | [M+H] <sup>+</sup>  |
| 542 | 937.7005 | 937.7022 | 1.8   | PA(50:1)       | [M+K] <sup>+</sup>  |
| 543 | 941.4915 | 941.4917 | 0.2   | PIP(O-34:1)    | [M+K] <sup>+</sup>  |
| 544 | 945.4870 | 945.4865 | 0.5   | PIP(O-36:5)    | [M+Na] <sup>+</sup> |
| 545 | 947.5024 | 947.5021 | 0.3   | CL(36:4)       | [M+Na] <sup>+</sup> |
| 546 | 959.4448 | 959.4448 | < 0.1 | PIP(P-36:5)    | [M+K] <sup>+</sup>  |
| 547 | 961.4604 | 961.4604 | < 0.1 | PIP(O-36:5)    | [M+K] <sup>+</sup>  |
| 548 | 961.5119 | 961.5106 | 1.4   | SQDG(44:12)    | [M+Na] <sup>+</sup> |
| 549 | 963.4762 | 963.4761 | 0.1   | CL(36:4)       | [M+K] <sup>+</sup>  |
| 550 | 965.6161 | 965.6172 | 1.1   | DGDG(36:3)     | [M+Na] <sup>+</sup> |
| 551 | 969.4850 | 969.4865 | 1.5   | PIP(P-38:6)    | [M+Na] <sup>+</sup> |
| 552 | 969.5489 | 969.5465 | 2.5   | PI(40:4(OH))   | [M+K] <sup>+</sup>  |
| 553 | 978.5228 | 978.5216 | 1.2   | CDP-DG(34:2)   | [M+H] <sup>+</sup>  |
| 554 | 981.5897 | 981.5911 | 1.4   | DGDG(36:3)     | [M+K] <sup>+</sup>  |
| 555 | 982.5922 | 982.5934 | 1.2   | PS(48:8)       | [M+K] <sup>+</sup>  |
| 556 | 987.4758 | 987.4761 | 0.3   | PIP(O-38:6)    | [M+K] <sup>+</sup>  |
| 557 | 987.5614 | 987.5628 | 1.4   | SQDG(44:7)     | [M+K] <sup>+</sup>  |
| 558 | 989.5426 | 989.5419 | 0.7   | SQDG(46:12)    | [M+Na] <sup>+</sup> |
| 559 | 992.4220 | 992.4227 | 0.7   | M(IP)2C(t20:0) | [M+H] <sup>+</sup>  |

Supporting Table 3: Established protocol for hematoxylin and eosin staining. Tissue sections were submerged in solvents for the dedicated time.

| Solvent       | Duration |
|---------------|----------|
| 100 % ethanol | 2 min    |
| 70 % ethanol  | 2 min    |
| 40 % ethanol  | 2 min    |
| Aqua dest.    | 2 min    |
| Hematoxylin   | 12 min   |
| Tap water     | 10 min   |
| 1 % eosin Y   | 1 min    |
| Aqua dest.    | 2 min    |
| 40 % ethanol  | 2 min    |
| 70 % ethanol  | 2 min    |
| 100 % ethanol | 2 min    |
| Xylene        | 2 min    |

## References

1. Liebisch, G.; Vizcaino, J.A.; Köfeler, H.; Trötz Müller, M.; Griffiths, W.J.; Schmitz, G.; Spener, F.; Wakelam, M.J.O. Shorthand notation for lipid structures derived from mass spectrometry. *Journal of Lipid Research* **2013**, *54*, 1523–1530, doi:10.1194/jlr.M033506.
2. Liebisch, G.; Fahy, E.; Aoki, J.; Dennis, E.A.; Durand, T.; Ejsing, C.S.; Fedorova, M.; Feussner, I.; Griffiths, W.J.; Köfeler, H.; et al. Update on LIPID MAPS classification, nomenclature, and shorthand notation for MS-derived lipid structures. *Journal of Lipid Research* **2020**, *61*, 1539–1555, doi:10.1194/jlr.S120001025.
